# Supplementary material for: Can the Robson 10 Group Classification System help identify which groups of women are driving the high caesarean section rate in major private hospitals in eastern Ethiopia? A cross-sectional study
Source: PubMed Central journal article supplement — BMJ Open. 2021 Aug 26;11(8):e047206. doi: 10.1136/bmjopen-2020-047206 (PMC8395281; doi:10.1136/bmjopen-2020-047206), 2021-08-26
Supplement: bmjopen-2020-047206.draft_revisions.pdf [file bmjopen-2020-047206.draft_revisions.pdf]

# BMJ Open

BMJ Open is committed to open peer review. As part of this commitment we make the peer review history of every article we publish publicly available.

When an article is published we post the peer reviewers' comments and the authors' responses online. We also post the versions of the paper that were used during peer review. These are the versions that the peer review comments apply to.

The versions of the paper that follow are the versions that were submitted during the peer review process. They are not the versions of record or the final published versions. They should not be cited or distributed as the published version of this manuscript.

BMJ Open is an open access journal and the full, final, typeset and author-corrected version of record of the manuscript is available on our site with no access controls, subscription charges or pay-per-view fees (<http://bmjopen.bmj.com>).

If you have any questions on BMJ Open's open peer review process please email [info.bmjopen@bmj.com](mailto:info.bmjopen@bmj.com)

# BMJ Open

## Which groups of women are driving the high caesarean section rate in private hospitals in eastern Ethiopia? A cohort study applying the Robson classification

|                               |                                                                                                                                                                                                                                                                                                                                                    |
|-------------------------------|----------------------------------------------------------------------------------------------------------------------------------------------------------------------------------------------------------------------------------------------------------------------------------------------------------------------------------------------------|
| Journal:                      | <i>BMJ Open</i>                                                                                                                                                                                                                                                                                                                                    |
| Manuscript ID                 | bmjopen-2020-047206                                                                                                                                                                                                                                                                                                                                |
| Article Type:                 | Original research                                                                                                                                                                                                                                                                                                                                  |
| Date Submitted by the Author: | 24-Nov-2020                                                                                                                                                                                                                                                                                                                                        |
| Complete List of Authors:     | Geze, Shegaw; Wolkite University Tura, Abera Kenay; Haramaya University, Nursing and Midwifery; University Medical Centre Groningen, Obstetrics and Gynaecology Fage, Sagni Girma; Haramaya University College of Health and Medical Sciences<br>van den Akker, Thomas; Leiden University Medical Center, Secretariat K6, Department of Obstetrics |
| Keywords:                     | OBSTETRICS, EPIDEMIOLOGY, AUDIT, PUBLIC HEALTH                                                                                                                                                                                                                                                                                                     |
|                               |                                                                                                                                                                                                                                                                                                                                                    |

SCHOLARONE™  
Manuscripts

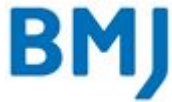

I, the Submitting Author has the right to grant and does grant on behalf of all authors of the Work (as defined in the below author licence), an exclusive licence and/or a non-exclusive licence for contributions from authors who are: i) UK Crown employees; ii) where BMJ has agreed a CC-BY licence shall apply, and/or iii) in accordance with the terms applicable for US Federal Government officers or employees acting as part of their official duties; on a worldwide, perpetual, irrevocable, royalty-free basis to BMJ Publishing Group Ltd ("BMJ") its licensees and where the relevant Journal is co-owned by BMJ to the co-owners of the Journal, to publish the Work in this journal and any other BMJ products and to exploit all rights, as set out in our [licence](#).

The Submitting Author accepts and understands that any supply made under these terms is made by BMJ to the Submitting Author unless you are acting as an employee on behalf of your employer or a postgraduate student of an affiliated institution which is paying any applicable article publishing charge ("APC") for Open Access articles. Where the Submitting Author wishes to make the Work available on an Open Access basis (and intends to pay the relevant APC), the terms of reuse of such Open Access shall be governed by a Creative Commons licence – details of these licences and which [Creative Commons](#) licence will apply to this Work are set out in our licence referred to above.

Other than as permitted in any relevant BMJ Author's Self Archiving Policies, I confirm this Work has not been accepted for publication elsewhere, is not being considered for publication elsewhere and does not duplicate material already published. I confirm all authors consent to publication of this Work and authorise the granting of this licence.

1  
2  
3 **Which groups of women are driving the high caesarean section rate in private**  
4 **hospitals in eastern Ethiopia? A cohort study applying the Robson**  
5 **classification**  
6  
7  
8  
9

10 Shegaw Geze<sup>1,2</sup>, Abera Kenay Tura<sup>2,3\*</sup>, Sagni Girma Fage<sup>2</sup>, Thomas van den  
11 Akker<sup>4,5</sup>  
12  
13

14  
15 <sup>1</sup>Department of midwifery, College of Health and Medical Sciences, Wolkite  
16 University, Wolkite, Ethiopia

17  
18 <sup>2</sup>School of nursing and midwifery, College of Health and Medical Sciences,  
19 Haramaya University, Harar, Ethiopia

20  
21 <sup>3</sup>Department of obstetrics and gynaecology, University Medical Centre Groningen,  
22 University of Groningen, Groningen, the Netherlands

23  
24 <sup>4</sup>Department of obstetrics and gynaecology, Leiden University Medical Centre,  
25 Leiden, the Netherlands

26  
27 <sup>5</sup>Athena Institute, Vrije Universiteit Amsterdam, Amsterdam, the Netherlands  
28  
29  
30  
31

32 **Correspondence\*:**

33 School of nursing and midwifery, College of health and medical sciences, Haramaya  
34 University, Harar, Ethiopia; [daberaf@gmail.com](mailto:daberaf@gmail.com) (AKT).  
35  
36  
37  
38

39 **Strengths and limitation of the study**

- 40  
41  
42  
43  
44  
45  
46  
47  
48  
49  
50  
51  
52  
53  
54  
55  
56  
57  
58  
59  
60
- The first study to apply the Robson classification to private hospitals in Ethiopia
  - Inclusion of all women who delivered in both facilities (CS and vaginal deliveries) during the study period helped us to indicate the Robson distribution as a whole and also among those who had CS.
  - Because routinely collected clinical data was used some sociodemographic variables of interest were missed.
  - The retrospective nature of the study may be prone to incomplete documentation.

## Abstract

**Objective:** Caesarean section (CS) rates in Ethiopian private hospitals are high compared to those in public facilities, and there are limited descriptions of the groups of women contributing to this high rate. The objective of this study was to describe the groups contributing to the increased CS rate using the Robson classification in selected private hospitals in eastern Ethiopia.

**Design:** Retrospective cross-sectional cohort study.

**Setting:** Two major private hospitals in eastern Ethiopia.

**Participants:** All women who underwent CS from January 09, 2019 to January 08, 2020.

**Primary and secondary outcome measures:** Primary outcome: Robson ten group classification. Secondary outcomes: indications for CS as recorded in the medical files.

**Results:** Of 1203 births in both hospitals combined during the study period, 415 (34.5%) were by CS. Women with a uterine scar due to previous CS (group 5), single cephalic term multiparous women in spontaneous labor (group 3), and single cephalic term nulliparous women in spontaneous labor (group 1) were the leading groups contributing 33%, 27.5%, and 17.1% respectively. The leading documented indications were fetal compromise (29.4%), previous CS (27.2%), and obstructed labor (12.3%).

**Conclusion:** Improving management of spontaneous labor and strengthening clinical practice around safely providing the option of vaginal birth after CS practice are strategies required to reduce the high CS rate in these private facilities.

**Keywords:** Robson classification, private hospitals, caesarean section, audit

## INTRODUCTION

With the unprecedented rise in caesarean section (CS) rates the need to institute a robust system to minimize unnecessary and medically nonindicated CS is warranted [1]. Risks associated with (repeated) CS for women and newborn are well established [2-4]. These range from increased risk of uterine rupture and abnormal placentation for the woman to stillbirth and iatrogenic preterm birth for the baby. Moreover, long term effect on hormonal, physical, bacterial, and physiological conditions and risk of allergic reactions on the newborn were also reported [4].

A recommended system for auditing clinical practice around CS is the Robson Ten Group Classification [4-6]. Based on obstetric history, course of labor and gestational age, the Robson classification categorizes all women undergoing CS into ten mutually exclusive and exhaustive groups [7-9]. Although the Robson classification has been promoted by the World Health Organization as a method to reduce CS rates [8, 10, 11], the system has rarely been applied to private facilities [12, 13].

Given the increase in global CS rates, including those in low-and middle-income countries [14-17] and in private facilities in particular, audit of CS practices and identifying groups contributing to CS rates are important methods to design appropriate interventions [12, 18-22]. To the best of our knowledge, no such study has been performed in private facilities in Ethiopia, rendering the contribution of different groups to overall CS rates in these institutions unknown [23, 24].

The aim of this study was to determine which groups are driving the CS rate in selected major private hospitals in eastern Ethiopia using the Robson Ten Group Classification system.

## METHODS

### Study designs and participants

This study was conducted as part of a larger study on maternal near miss and mortality in major private hospitals in eastern Ethiopia. A retrospective cross-sectional study was conducted from February 1 to 29, 2020 at the department of obstetrics and gynaecology of Harar General Hospital (HGH) and Bilal Hospital (BH)—the two major

private hospitals in Harar and Dire Dawa towns, eastern Ethiopia. The study population included all women who gave birth by CS in both hospitals from January 09, 2019 to January 08, 2020. To enable comparisons, records of women who gave birth vaginally were also reviewed. The identity of all women who visited both hospitals for maternity services were obtained from the admission and discharge registers, delivery log books, and operation theatre registers. Using their medical registration number, all files were retrieved from the archive rooms at both hospitals and reviewed by research assistants who received dedicated in-service training.

### Study setting

HGH is a general specialized 33-bed private hospital in Harar providing specialized care in internal medicine, surgery, obstetrics and gynecology, pediatrics and child health, and some other smaller fields. During the study period, five consultants and six midwives were practicing at the department of obstetrics. It provides care for both emergency and planned CS by consultants, with approximately 1000 births annually. BH is one of the major private hospitals in Dire Dawa with almost 600 deliveries annually. Both hospitals have one major operation theatre which they share with all surgical specialties. Unlike public facilities, where all maternity services are free [25], a typical CS procedure costs 10,000-15,000 Ethiopian Birr (\$267-400).

### Variables

The dependent variable was the Robson classification groups, one to ten based on the category of the pregnancy, presence of previous uterine scar, the course of labour and delivery, and the gestational age of the pregnancy (Box 1) [7]. The independent variables included sociodemographic conditions (age, referral status, residence), medical and obstetric history and conditions present in the index pregnancy.

Box 1: Robson's ten group caesarean section classification system [7]

| Group | Description                                                                                        |
|-------|----------------------------------------------------------------------------------------------------|
| 1     | Nulliparous, single cephalic, $\geq 37$ weeks, in spontaneous labour                               |
| 2     | Nulliparous, single cephalic, $\geq 37$ weeks, induced or CS before labour                         |
| 3     | Multiparous (excluding previous CS), single cephalic, $\geq 37$ weeks, in spontaneous labour       |
| 4     | Multiparous (excluding previous CS), single cephalic, $\geq 37$ weeks, induced or CS before labour |
| 5     | Previous CS, single cephalic, $\geq 37$ weeks                                                      |
| 6     | All nulliparous breeches                                                                           |
| 7     | All multiparous breeches (including previous CS)                                                   |

|    |                                                        |
|----|--------------------------------------------------------|
| 8  | All multiple pregnancies (including previous CS)       |
| 9  | All abnormal lies (including previous CS)              |
| 10 | All single cephalic, <37 weeks (including previous CS) |

---

## Data collection

Trained research assistants collected data on maternal characteristics (age, parity, antenatal booking, referral status), obstetric and medical history and conditions (history of uterine scar, history or presence of obstetric complications), labor and delivery related information (onset, presentation, mode of birth, indication for CS for births by CS), fetal/neonatal information (vital status at birth, fifth minute APGAR score, admission to special intensive care unit, birth weight), and maternal and fetal outcome at discharge.

## Data processing and analysis

All collected data were cross-checked for completeness and consistency and double entered to EpiData 3.1 (<http://www.epidata.dk>) and exported to Stata 13 (<https://www.stata.com>) for analysis. The Robson group was determined using the four basic obstetric concepts and their parameters—pregnancy category, history of CS, course of labor and gestational age [7]. In addition, indications reported for CS were classified as absolute and non-absolute indications as per the recommendation by Stanton and Ronsmans [26]. Absolute indications include obstructed labor, major antepartum hemorrhage (including placenta previa grades 3 and 4), malpresentation (transverse, oblique, and brow presentation), and uterine rupture in hierarchical order. Non-absolute indications included previous history of CS, fetal compromise, failure to progress (prolonged labor, failed induction), breech, severe pre-eclampsia and eclampsia without hierarchical order.

## Patient and public involvement

Patients and/or the public were not involved in the design, or conduct, or reporting, or dissemination plans of this research.

## RESULTS



During the study period, 1287 maternity admissions were reported. After excluding 73 (5.7%) lost or incomplete files, 1214 records with complete data were reviewed constituting 1203 births (excluding abortions and laparotomies not resulting in births). A total of 415 births were by CS, making the overall CS rate 34.5% (277/839; 33% in hospital A and 138/364; 37.9% in hospital B). The mean age of participants was 26.7( $\pm$ 5.3) years ranging from 17 to 40. The mean gestational age was 38.9( $\pm$ 1.6) weeks. The majority of women were married (98.8%), urban residents (70.6%), and self-referred (94.9%). Details of sociodemographic conditions are summarized in Table 1.

Table 1: Sociodemographic conditions of women who underwent CS in selected private hospitals in eastern Ethiopia, 2020

| Variable                           | Frequency | %    |
|------------------------------------|-----------|------|
| <b>Age</b>                         |           |      |
| <20                                | 37        | 8.9  |
| 20-35                              | 356       | 85.8 |
| >35                                | 22        | 5.3  |
| <b>Residence</b>                   |           |      |
| Urban                              | 293       | 70.6 |
| Rural                              | 122       | 29.4 |
| <b>Type of CS</b>                  |           |      |
| Elective                           | 85        | 20.5 |
| Emergency                          | 350       | 79.5 |
| <b>Referral status</b>             |           |      |
| Self-referral                      | 394       | 94.9 |
| Referred from other facilities     | 21        | 5.1  |
| <b>Antenatal care (at least 1)</b> |           |      |
| Yes                                | 387       | 93.3 |
| No                                 | 28        | 6.7  |
| <b>Parity</b>                      |           |      |
| 0                                  | 95        | 22.9 |
| 1-4                                | 285       | 68.7 |
| >4                                 | 35        | 8.4  |
| <b>Gestational age (weeks)</b>     |           |      |
| Preterm (<37)                      | 9         | 2.2  |
| Term (37-42)                       | 400       | 96.4 |
| Post term (>42)                    | 6         | 1.4  |
| <b>Onset of labor</b>              |           |      |
| Spontaneous                        | 285       | 68.7 |
| Induced                            | 24        | 5.8  |
| CS before labor                    | 106       | 25.5 |
| <b>Fetal presentation</b>          |           |      |
| Cephalic                           | 393       | 94.7 |
| Breech                             | 18        | 4.3  |
| Transverse                         | 4         | 1    |
| <b>Birth weight (gram)</b>         |           |      |
| <2500                              | 12        | 2.9  |
| 2500-4000                          | 393       | 94.7 |
| >4000                              | 10        | 2.4  |

CS, cesarean section

## Analysis of the Robson classification

The three leading Robson groups were Robson group 5 (n=137;33%), 3 (n=114; 27.5%) and 1 (n=71;17.1%). The overall contribution of the 'high risk groups' (group 6, 7,8, and 9) to the overall CS rate was almost nil (6.2%). Details of the Robson groups and their respective contributions are summarized in Figure 1 and Table 2.

Figure 1: Distribution of women undergoing CS according to the Robson groups in selected private hospitals in eastern Ethiopia, 2020.

Table 2: Distribution of Robson groups and their contribution to the overall CS rate in selected private hospitals in eastern Ethiopia, 2020.

| Group | Description                                                                                    | CS/all births in the group | Contribution per group to total births (%) | CS rate within group (%) | Contribution per group to the CS rate (%) |
|-------|------------------------------------------------------------------------------------------------|----------------------------|--------------------------------------------|--------------------------|-------------------------------------------|
| 1     | Nulliparous, single cephalic, $\geq 37$ weeks, in spontaneous labor                            | 71/197                     | 16.4                                       | 36.0                     | 17.1                                      |
| 2     | Nulliparous, single cephalic, $\geq 37$ weeks, induced or CS before labor                      | 19/27                      | 2.2                                        | 70.4                     | 4.6                                       |
| 3     | Multiparous (excluding prev. CS), single cephalic, $\geq 37$ weeks, in spontaneous labor       | 114/690                    | 57.4                                       | 16.5                     | 27.5                                      |
| 4     | Multiparous (excluding prev. CS), single cephalic, $\geq 37$ weeks, induced or CS before labor | 39/72                      | 6.0                                        | 54.2                     | 9.4                                       |
| 5     | Previous CS, single cephalic, $\geq 37$ weeks                                                  | 137/153                    | 12.7                                       | 89.5                     | 33.0                                      |
| 6     | All nulliparous breeches                                                                       | 1/1                        | 0.1                                        | 100                      | 0.24                                      |
| 7     | All multiparous breeches                                                                       | 13/22                      | 1.8                                        | 59.1                     | 3.1                                       |
| 8     | All multiple pregnancies (including prev. CS)                                                  | 9/15                       | 1.2                                        | 60                       | 2.2                                       |
| 9     | All abnormal lies (including prev. CS)                                                         | 3/3                        | 0.3                                        | 100                      | 0.7                                       |
| 10    | All single cephalic, $\leq 36$ weeks (including prev. CS)                                      | 9/23                       | 1.9                                        | 39.1                     | 2.2                                       |
|       | <b>Total</b>                                                                                   | <b>415/1203</b>            | <b>100</b>                                 | <b>34.5</b>              | <b>100</b>                                |

## Overall and within group indication for CS

As indicated in Figure 2, the leading indications for performing CS in this study were fetal compromise (29.4%), previous CS (27.2%), and obstructed labor (12.3%). In general, CS was performed for absolute indications in 24.1% only (Figure 2).

Figure 2: Indications for performing CS in selected private hospitals in eastern Ethiopia, 2020.

Major indications within each Robson group are summarized in Table 3. Except for Robson groups 9 and 10 where malpresentation (n=3/3) and major APH (n=5/9) were

leading indications, non-absolute indications were the main indications in all other groups: fetal compromise in Groups 1 (n=40/71; 56.3%) and 3 (n=68/114; 59.6%); previous CS in Group 5 (n=106/137; 77.4%); breech presentation in Group 6 (n=1/1;100%), Group 7 (n=10/13;76.9%), Group 8 (n=4/9; 44.4%).

Table 3: Overall and within Robson group indications for performing CS in selected private hospitals in eastern Ethiopia, 2020.

| indications                     | Group 1   | Group 2   | Group 3    | Group 4   | Group 5    | Group 6  | Group 7   | Group 8  | Group 9  | Group 10 | Total      |
|---------------------------------|-----------|-----------|------------|-----------|------------|----------|-----------|----------|----------|----------|------------|
| <b>Absolute indications</b>     |           |           |            |           |            |          |           |          |          |          |            |
| Obstructed labor                | 19 (26.8) | 2         | 24         | 2         | 4          | 0        | 0         | 0        | 0        | 0        | 51         |
| Major APH                       | 2         | 1         | 14         | 6         | 9          | 0        | 0         | 0        | 0        | 5 (55.6) | 37         |
| Malpresentation                 | 0         | 0         | 0          | 0         | 0          | 0        | 0         | 2        | 3 (100)  | 0        | 5          |
| Uterine rupture                 | 0         | 0         | 0          | 0         | 7          | 0        | 0         | 0        | 0        | 0        | 7          |
| <b>Non-absolute indications</b> |           |           |            |           |            |          |           |          |          |          |            |
| Previous CS                     | 0         | 0         | 2          | 2         | 106 (77.4) | 0        | 2         | 1        | 0        | 0        | 113        |
| Fetal compromise                | 40 (56.3) | 0         | 68 (59.6)  | 4         | 5          | 0        | 1         | 1        | 0        | 3        | 122        |
| Failure to progress             | 4         | 6         | 1          | 13        | 1          | 0        | 0         | 0        | 0        | 0        | 25         |
| Breech                          | 0         | 0         | 0          | 0         | 0          | 1 (100)  | 10 (76.9) | 4 (44.4) | 0        | 0        | 15         |
| (Severe pre-) eclampsia         | 5         | 2         | 4          | 1         | 3          | 0        | 0         | 0        | 0        | 1        | 16         |
| Others                          | 1         | 8         | 1          | 11        | 2          | 0        | 0         | 1        | 0        | 0        | 24         |
| <b>Total</b>                    | <b>71</b> | <b>19</b> | <b>114</b> | <b>39</b> | <b>137</b> | <b>1</b> | <b>13</b> | <b>9</b> | <b>3</b> | <b>9</b> | <b>415</b> |

APH, antepartum hemorrhage; CS, caesarean section

## DISCUSSION

This study was conducted to describe CS in selected private hospitals using the Robson classification. We found that women with a history of CS in a previous pregnancy (Group 5), single cephalic multiparous women at term in spontaneous labour with no previous history of CS (Group 3), and single cephalic nulliparous women at term and in spontaneous labour (Group 1) were the leading Robson groups contributing to eight in ten CS. In addition, the relatively moderate risk groups (Groups 1 to 4 combined), contributed to 58.6% of all CS in the participating private hospitals. The leading recorded indications for performing CS were fetal compromise, previous

1  
2  
3 CS, and obstructed labor. Although the application of Robson classification for auditing  
4 CS is common practice, to the best of our knowledge, this is only the second reported  
5 study to apply this classification to private hospitals in a low-and middle-income  
6 country after the study by Begum et al in Bangladesh [13].  
7  
8  
9

10  
11 Looking into the quality of data as per the WHO recommendation [8], shows good  
12 quality of data. The size of group 9 is in the expected range of <1% (0.3) with overall  
13 CS rate of 100%. In addition, looking into relative size of combination of 'group 1 and  
14 2' (18.6%), and 'group 3 and 4' (63.3%) in Table 2 (column 3) shows the presence of  
15 high multiparous women in the database, as evidence by high total fertility rate (4.6)  
16 in the country [27]. It may also reflect high vaginal delivery among women without prior  
17 scars. Furthermore, the ratio of 'group 3 to 4' is higher than the ratio of 'group 1 to 2'  
18 indicating good quality of data [8]. However, the ratio of 'group 6 to 7' was very low  
19 (0.05) compared to the expected high breeches among nulliparas compared to  
20 multipara. Given the quality of our data is acceptable as indicated by other parameters  
21 above, this requires further audit.  
22  
23  
24  
25  
26  
27  
28  
29

30  
31 Given that groups 5, 3 and 1 constitute large demographic shares, it was expected  
32 that these would contribute largely to the overall CS. However, the fact that CS rates  
33 within these groups were 89.5%,16.5%, and 36.0%, respectively indicates vast  
34 opportunities to reduce CS rates by strengthening clinical practice around vaginal  
35 birth, including vaginal birth after CS. The numbers do raise concerns about quality of  
36 care around vaginal birth in private care facilities in Ethiopia. Although group 5  
37 comprised 12.5% of all births, it contributed 33% to the overall CS rate—possibly  
38 indicating low utilization of trial of labor or instrumental vaginal birth. Trial of labor in  
39 sub-Saharan Africa in general is low [28] although this practice may be justified in a  
40 majority of women with a previous scar if combined with proper labor monitoring [29]  
41  
42  
43  
44  
45  
46  
47  
48

49  
50 Although the overall CS rate in this study is not as high as that in private hospitals in  
51 some other clinics, it requires further study since a majority (68%) of women who  
52 undergone CS did not have any underlying obstetric complications [30]. In addition,  
53 the high CS rate among women with a scarred uterus (89.2%) requires further audit  
54 of obstetric interventions provided to these women. Since these private hospitals are  
55 well equipped with fetal monitoring and the ability to perform CS quickly, trial of labor  
56 after CS should be attempted; the missed opportunities should be further explored.  
57  
58  
59  
60

## Declarations

**Acknowledgements** We want to thank the hospital managers for allowing us to conduct this study in their respective hospitals.

**Contributors** AKT conceived the study and wrote the original draft of the manuscript which was subsequently reviewed by SG, SGF, and Tvda. SG was involved in proposal development and collected data under the supervision and mentorship of AKT. Analysis was done by AKT. SG, SGF, and Tvda reviewed the manuscript for intellectual content and participated in revision. All authors contributed to the writing and reviewed the article and approved the final version of the manuscript to be published.

**Funding** SG received a grant from Haramaya University for his MSc study (grant number: not applicable).

**Disclaimer** The funding organisation has no role in the design, execution or decision to publish the study.

**Competing interests** None declared.

**Patient consent** Not required.

**Ethics approval** This study was approved by the institutional health research ethics review committee of College of Health and Medical Sciences, Haramaya University, Ethiopia (IHRERC/045/2020).

**Data sharing statement** Data essential for conclusion are included in the manuscript. Additional data can be obtained from the corresponding author on reasonable request.

## REFERENCES

- 1 Betrán AP, Meriáldi M, Lauer JA, et al. Rates of caesarean section: analysis of global, regional and national estimates, *Paediatr Perinat Epidemiol* 2007;21:98-113.
- 2 Keag OE, Norman JE, Stock SJ. Long-term risks and benefits associated with cesarean delivery for mother, baby, and subsequent pregnancies: Systematic review and meta-analysis, *PLoS Med* 2018;15:e1002494
- 3 Masukume G, McCarthy FP, Russell J, et al. Caesarean section delivery and childhood obesity: evidence from the growing up in New Zealand cohort, *J Epidemiol Community Health* 2019;73:1063-70.

- 1  
2  
3 4 Sandall J, Tribe RM, Avery L, et al. Short-term and long-term effects of caesarean  
4 section on the health of women and children, *Lancet* 2018;392:1349-57.  
5
- 6  
7 5 Betrán AP, Vindevoghel N, Souza JP, et al. A systematic review of the Robson  
8 classification for caesarean section: what works, doesn't work and how to improve it,  
9 *PLoS One* 2014;9:e97769.  
10
- 11  
12 6 Le Ray C, Blondel B, Prunet C, et al. Stabilising the caesarean rate: which target  
13 population? *BJOG* 2015;122:690-9.  
14
- 15  
16 7 Robson MS. Can we reduce the caesarean section rate? *Best Pract Res Clin  
17 Obstet Gynaecol* 2001;15:179-94.  
18
- 19  
20 8 World Health Organization. Robson classification: implementation manual, 2017.  
21
- 22  
23 9 Robson M. The Ten Group Classification System (TGCS) - a common starting  
24 point for more detailed analysis, *BJOG* 2015;122:701,0528.13267.  
25
- 26  
27 10 Alonso BD, Silva, F. M. B. D., Latorre, M. D. R. D. O., et al. Caesarean birth rates  
28 in public and privately funded hospitals: a cross-sectional study, *Rev Saude Publica*  
29 2017;51:101,8787.2017051007054.  
30
- 31  
32 11 Hoxha I, Syrogiannouli L, Luta X, et al. Caesarean sections and for-profit status of  
33 hospitals: systematic review and meta-analysis, *BMJ Open* 2017;7:e013670.  
34
- 35  
36 12 Atnurkar KB, Mahale AR. Audit of Caesarean Section Births in Small Private  
37 Maternity Homes: Analysis of 15-Year Data Applying the Modified Robson Criteria,  
38 Canada, *J Obstet Gynaecol India* 2016;66:289-94.  
39
- 40  
41 13 Begum T, Nababan H, Rahman A, et al. Monitoring caesarean births using the  
42 Robson ten group classification system: A cross-sectional survey of private for-profit  
43 facilities in urban Bangladesh, *PLoS One* 2019;14:e0220693.  
44
- 45  
46 14 Betrán AP, Ye J, Moller AB, et al. The Increasing Trend in Caesarean Section  
47 Rates: Global, Regional and National Estimates: 1990-2014, *PLoS One*  
48 2016;11:e0148343.  
49
- 50  
51 15 Cavallaro FL, Cresswell JA, França GV, et al. Trends in caesarean delivery by  
52 country and wealth quintile: cross-sectional surveys in southern Asia and sub-  
53 Saharan Africa, *Bull World Health Organ* 2013;91:914-922D.  
54
- 55  
56 16 Hanson C, Betrán AP, Opondo C, et al. Trends in caesarean section rates  
57 between 2007 and 2013 in obstetric risk groups inspired by the Robson  
58 classification: results from population-based surveys in a low-resource setting, *BJOG*  
59 2019;126:690-700  
60
- 17 Harrison MS, Saleem S, Ali S, et al. A Prospective, Population-Based Study of  
Trends in Operative Vaginal Delivery Compared to Cesarean Delivery Rates in Low-  
and Middle-Income Countries, 2010-2016, *Am J Perinatol* 2019;36:730-6

1  
2  
3 18 Chanrachakul B, Herabutya Y, Udomsubpayakul U. Epidemic of cesarean section  
4 at the general, private and university hospitals in Thailand, *J Obstet Gynaecol Res*  
5 2000;26:357-61.  
6

7  
8 19 Phadungkiatwattana P, Tongsakul N. Analyzing the impact of private service on  
9 the cesarean section rate in public hospital Thailand, *Arch Gynecol Obstet*  
10 2011;284:1375-9  
11

12 20 Einarsdóttir K, Haggard F, Pereira G, et al. Role of public and private funding in the  
13 rising caesarean section rate: a cohort study, *BMJ Open* 2013;3:e002789.  
14

15  
16 21 Dahlen HG, Tracy S, Tracy M, et al. Rates of obstetric intervention among low-  
17 risk women giving birth in private and public hospitals in NSW: a population-based  
18 descriptive study, *BMJ Open* 2012;2:e001723.  
19

20 22 Ali Y, Khan MW, Mumtaz U, et al. Identification of factors influencing the rise of  
21 cesarean sections rates in Pakistan, using MCDM, *Int J Health Care Qual Assur*  
22 2018;31:1058-69.  
23

24 23 Gebremedhin S. Trend and socio-demographic differentials of Caesarean section  
25 rate in Addis Ababa, Ethiopia: analysis based on Ethiopia demographic and health  
26 surveys data, *Reprod Health* 2014;11  
27

28  
29 24 Tura AK, Pijpers O, de Man M, et al. Analysis of caesarean sections using  
30 Robson 10-group classification system in a university hospital in eastern Ethiopia: a  
31 cross-sectional study, *BMJ Open* 2018;8:e020520.  
32

33  
34 25 Pearson L, Gandhi M, Admasu K, et al. User fees and maternity services in  
35 Ethiopia, *Int J Gynaecol Obstet* 2011;115:310-5.  
36

37 26 Stanton C, Ronsmans C, Baltimore Group on Cesarean. Recommendations for  
38 routine reporting on indications for cesarean delivery in developing countries, *Birth*  
39 2008;35:204-11.  
40

41  
42 27 CSA and ICF. Ethiopia Demographic and Health Survey 2016, *Addis Ababa,*  
43 *Ethiopia, and Rockville, Maryland, USA: CSA and ICF* 2016.  
44

45  
46 28 Boulvain M, Fraser WD, Brisson-Carroll G, et al. Trial of labour after caesarean  
47 section in sub-Saharan Africa: a meta-analysis, *Br J Obstet Gynaecol*  
48 1997;104:1385-90.  
49

50 29 van Roosmalen J. Vaginal birth after cesarean section in rural Tanzania, *Int J*  
51 *Gynaecol Obstet* 1991;34:211-5.  
52

53  
54 30 Bishop D, Dyer RA, Maswime S, et al. Maternal and neonatal outcomes after  
55 caesarean delivery in the African Surgical Outcomes Study: a 7-day prospective  
56 observational cohort study, *The Lancet Global Health* 2019;7:e513-22.  
57  
58  
59  
60

1 Figure 1

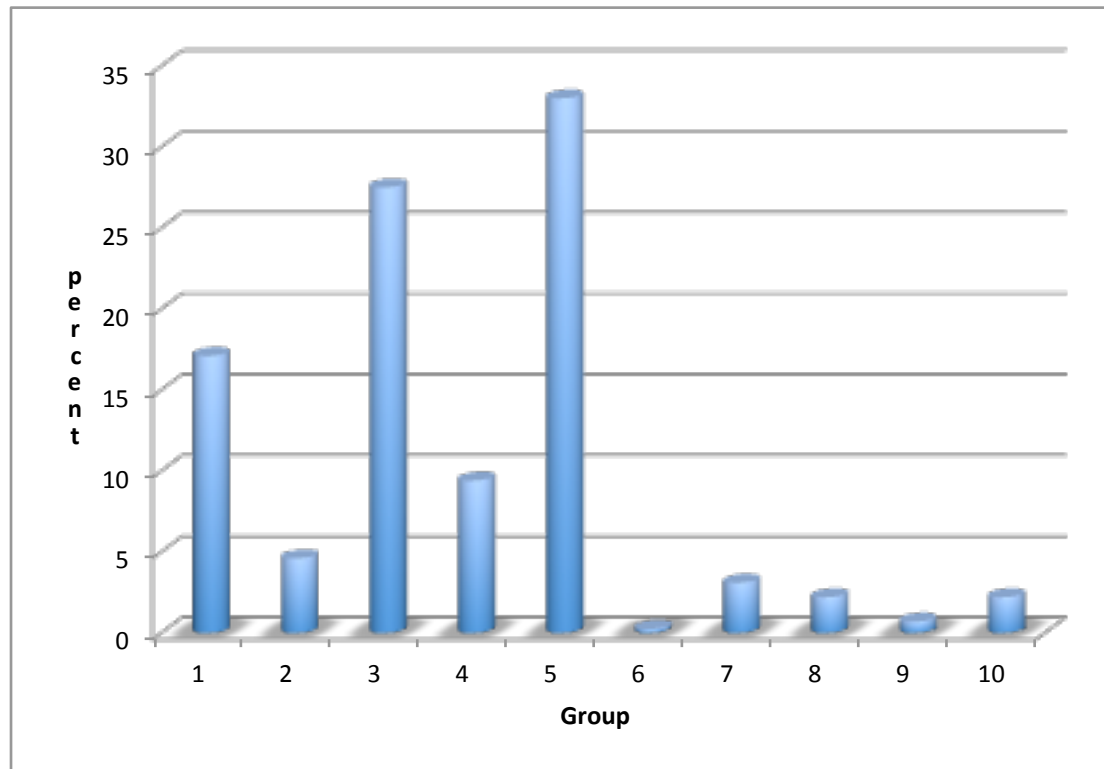

27 Figure 1: Distribution of women undergoing CS according to the Robson groups in selected private hospitals in  
28 eastern Ethiopia, 2020.  
29  
30



1 Figure 2

2  
3  
4  
5  
6  
7  
8  
9  
10  
11  
12  
13  
14  
15  
16  
17  
18  
19  
20  
21  
22  
23  
24  
25  
26  
27  
28  
29  
30  
31  
32  
33  
34  
35  
36  
37  
38  
39  
40  
41  
42  
43  
44  
45  
46  
47  
48  
49  
50  
51  
52  
53  
54  
55  
56  
57  
58  
59  
60

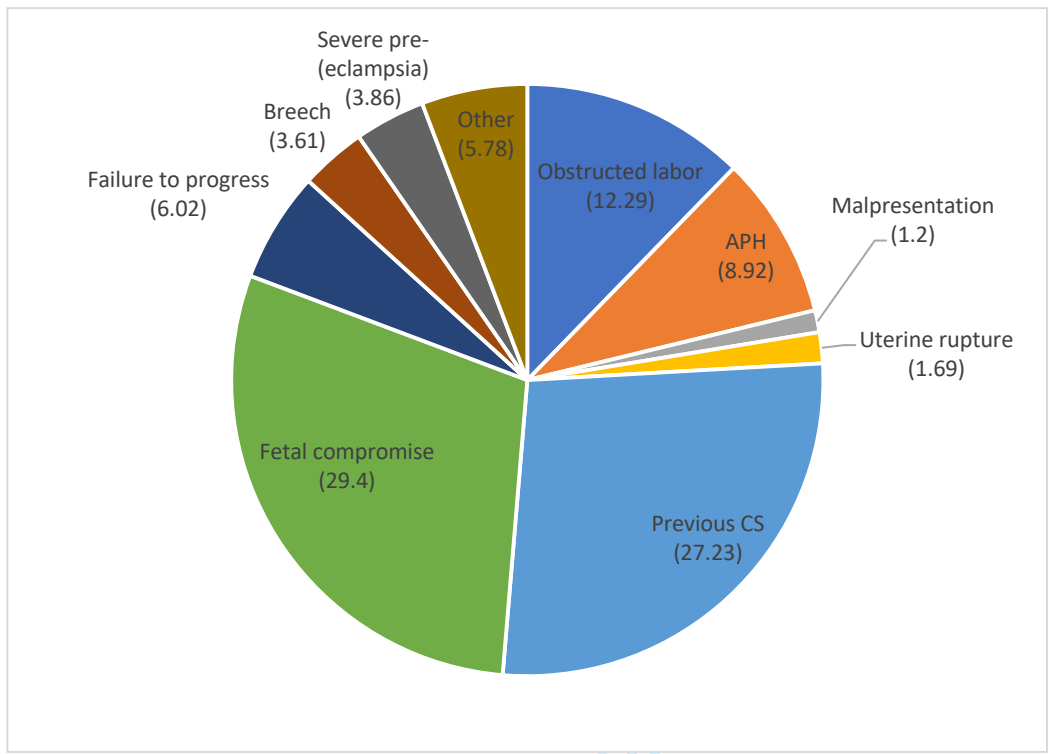

Figure 2: Indications for performing CS in selected private hospitals in eastern Ethiopia, 2020.

**STROBE 2007 (v4) Statement—Checklist of items that should be included in reports of *cross-sectional studies***

| Section/Topic                | Item # | Recommendation                                                                                                                                                                       | Reported on page # |
|------------------------------|--------|--------------------------------------------------------------------------------------------------------------------------------------------------------------------------------------|--------------------|
| <b>Title and abstract</b>    | 1      | (a) Indicate the study's design with a commonly used term in the title or the abstract                                                                                               | 1                  |
|                              |        | (b) Provide in the abstract an informative and balanced summary of what was done and what was found                                                                                  | 2                  |
| <b>Introduction</b>          |        |                                                                                                                                                                                      |                    |
| Background/rationale         | 2      | Explain the scientific background and rationale for the investigation being reported                                                                                                 | 3                  |
| Objectives                   | 3      | State specific objectives, including any prespecified hypotheses                                                                                                                     | 3                  |
| <b>Methods</b>               |        |                                                                                                                                                                                      |                    |
| Study design                 | 4      | Present key elements of study design early in the paper                                                                                                                              | 4-5                |
| Setting                      | 5      | Describe the setting, locations, and relevant dates, including periods of recruitment, exposure, follow-up, and data collection                                                      | 4                  |
| Participants                 | 6      | (a) Give the eligibility criteria, and the sources and methods of selection of participants                                                                                          | 5                  |
| Variables                    | 7      | Clearly define all outcomes, exposures, predictors, potential confounders, and effect modifiers. Give diagnostic criteria, if applicable                                             | 5                  |
| Data sources/<br>measurement | 8*     | For each variable of interest, give sources of data and details of methods of assessment (measurement). Describe comparability of assessment methods if there is more than one group | 5                  |
| Bias                         | 9      | Describe any efforts to address potential sources of bias                                                                                                                            | na                 |
| Study size                   | 10     | Explain how the study size was arrived at                                                                                                                                            | 5                  |
| Quantitative variables       | 11     | Explain how quantitative variables were handled in the analyses. If applicable, describe which groupings were chosen and why                                                         | 5                  |
| Statistical methods          | 12     | (a) Describe all statistical methods, including those used to control for confounding                                                                                                | 5                  |
|                              |        | (b) Describe any methods used to examine subgroups and interactions                                                                                                                  | na                 |
|                              |        | (c) Explain how missing data were addressed                                                                                                                                          | na                 |
|                              |        | (d) If applicable, describe analytical methods taking account of sampling strategy                                                                                                   | na                 |
|                              |        | (e) Describe any sensitivity analyses                                                                                                                                                | na                 |
| <b>Results</b>               |        |                                                                                                                                                                                      |                    |

|                          |     |                                                                                                                                                                                                              |     |
|--------------------------|-----|--------------------------------------------------------------------------------------------------------------------------------------------------------------------------------------------------------------|-----|
| Participants             | 13* | (a) Report numbers of individuals at each stage of study—eg numbers potentially eligible, examined for eligibility, confirmed eligible, included in the study, completing follow-up, and analysed            | 6   |
|                          |     | (b) Give reasons for non-participation at each stage                                                                                                                                                         | 6   |
|                          |     | (c) Consider use of a flow diagram                                                                                                                                                                           | 6   |
| Descriptive data         | 14* | (a) Give characteristics of study participants (eg demographic, clinical, social) and information on exposures and potential confounders                                                                     | 6   |
|                          |     | (b) Indicate number of participants with missing data for each variable of interest                                                                                                                          | na  |
| Outcome data             | 15* | Report numbers of outcome events or summary measures                                                                                                                                                         | 7-9 |
| Main results             | 16  | (a) Give unadjusted estimates and, if applicable, confounder-adjusted estimates and their precision (eg, 95% confidence interval). Make clear which confounders were adjusted for and why they were included | 7-9 |
|                          |     | (b) Report category boundaries when continuous variables were categorized                                                                                                                                    | na  |
|                          |     | (c) If relevant, consider translating estimates of relative risk into absolute risk for a meaningful time period                                                                                             | na  |
| Other analyses           | 17  | Report other analyses done—eg analyses of subgroups and interactions, and sensitivity analyses                                                                                                               | na  |
| <b>Discussion</b>        |     |                                                                                                                                                                                                              |     |
| Key results              | 18  | Summarise key results with reference to study objectives                                                                                                                                                     | 9   |
| Limitations              | 19  | Discuss limitations of the study, taking into account sources of potential bias or imprecision. Discuss both direction and magnitude of any potential bias                                                   | 10  |
| Interpretation           | 20  | Give a cautious overall interpretation of results considering objectives, limitations, multiplicity of analyses, results from similar studies, and other relevant evidence                                   | 10  |
| Generalisability         | 21  | Discuss the generalisability (external validity) of the study results                                                                                                                                        | 10  |
| <b>Other information</b> |     |                                                                                                                                                                                                              |     |
| Funding                  | 22  | Give the source of funding and the role of the funders for the present study and, if applicable, for the original study on which the present article is based                                                | 10  |

\*Give information separately for cases and controls in case-control studies and, if applicable, for exposed and unexposed groups in cohort and cross-sectional studies.

**Note:** An Explanation and Elaboration article discusses each checklist item and gives methodological background and published examples of transparent reporting. The STROBE checklist is best used in conjunction with this article (freely available on the Web sites of PLoS Medicine at <http://www.plosmedicine.org/>, Annals of Internal Medicine at <http://www.annals.org/>, and Epidemiology at <http://www.epidem.com/>). Information on the STROBE Initiative is available at [www.strobe-statement.org](http://www.strobe-statement.org).

# BMJ Open

## Can the Robson Ten Group Classification System help identify which groups of women are driving the high caesarean section rate in major private hospitals in Eastern Ethiopia? A cross-sectional study

|                                 |                                                                                                                                                                                                                                                                                                                                                                             |
|---------------------------------|-----------------------------------------------------------------------------------------------------------------------------------------------------------------------------------------------------------------------------------------------------------------------------------------------------------------------------------------------------------------------------|
| Journal:                        | <i>BMJ Open</i>                                                                                                                                                                                                                                                                                                                                                             |
| Manuscript ID                   | bmjopen-2020-047206.R1                                                                                                                                                                                                                                                                                                                                                      |
| Article Type:                   | Original research                                                                                                                                                                                                                                                                                                                                                           |
| Date Submitted by the Author:   | 03-May-2021                                                                                                                                                                                                                                                                                                                                                                 |
| Complete List of Authors:       | Geze, Shegaw; Wolkite University, Department of Midwifery Tura, Abera Kenay; Haramaya University, Nursing and Midwifery; University Medical Centre Groningen, Obstetrics and Gynaecology Fage, Sagni Girma; Haramaya University College of Health and Medical Sciences<br>van den Akker, Thomas; Leiden University Medical Center, Secretariat K6, Department of Obstetrics |
| <b>Primary Subject Heading</b>: | Obstetrics and gynaecology                                                                                                                                                                                                                                                                                                                                                  |
| Secondary Subject Heading:      | Epidemiology, Global health, Health services research, Public health                                                                                                                                                                                                                                                                                                        |
| Keywords:                       | OBSTETRICS, EPIDEMIOLOGY, AUDIT, PUBLIC HEALTH                                                                                                                                                                                                                                                                                                                              |
|                                 |                                                                                                                                                                                                                                                                                                                                                                             |

SCHOLARONE™  
Manuscripts



I, the Submitting Author has the right to grant and does grant on behalf of all authors of the Work (as defined in the below author licence), an exclusive licence and/or a non-exclusive licence for contributions from authors who are: i) UK Crown employees; ii) where BMJ has agreed a CC-BY licence shall apply, and/or iii) in accordance with the terms applicable for US Federal Government officers or employees acting as part of their official duties; on a worldwide, perpetual, irrevocable, royalty-free basis to BMJ Publishing Group Ltd ("BMJ") its licensees and where the relevant Journal is co-owned by BMJ to the co-owners of the Journal, to publish the Work in this journal and any other BMJ products and to exploit all rights, as set out in our [licence](#).

The Submitting Author accepts and understands that any supply made under these terms is made by BMJ to the Submitting Author unless you are acting as an employee on behalf of your employer or a postgraduate student of an affiliated institution which is paying any applicable article publishing charge ("APC") for Open Access articles. Where the Submitting Author wishes to make the Work available on an Open Access basis (and intends to pay the relevant APC), the terms of reuse of such Open Access shall be governed by a Creative Commons licence – details of these licences and which [Creative Commons](#) licence will apply to this Work are set out in our licence referred to above.

Other than as permitted in any relevant BMJ Author's Self Archiving Policies, I confirm this Work has not been accepted for publication elsewhere, is not being considered for publication elsewhere and does not duplicate material already published. I confirm all authors consent to publication of this Work and authorise the granting of this licence.

1  
2  
3 **Can the Robson Ten Group Classification System help identify which groups**  
4 **of women are driving the high caesarean section rate in major private**  
5 **hospitals in Eastern Ethiopia? A cross-sectional study**  
6  
7  
8  
9

10 Shegaw Geze<sup>1,2</sup>, Abera Kenay Tura<sup>2,3\*</sup>, Sagni Girma Fage<sup>2</sup>, Thomas van den  
11 Akker<sup>4,5</sup>  
12  
13

14  
15 <sup>1</sup>Department of midwifery, College of Health and Medical Sciences, Wolkite  
16 University, Wolkite, Ethiopia

17  
18 <sup>2</sup>School of nursing and midwifery, College of Health and Medical Sciences,  
19 Haramaya University, Harar, Ethiopia

20  
21 <sup>3</sup>Department of obstetrics and gynaecology, University Medical Centre Groningen,  
22 University of Groningen, Groningen, the Netherlands

23  
24 <sup>4</sup>Department of obstetrics and gynaecology, Leiden University Medical Centre,  
25 Leiden, the Netherlands

26  
27 <sup>5</sup>Athena Institute, Vrije Universiteit Amsterdam, Amsterdam, the Netherlands  
28  
29  
30  
31

32 **Correspondence\*:**

33 School of nursing and midwifery, College of health and medical sciences, Haramaya  
34 University, Harar, Ethiopia; [daberaf@gmail.com](mailto:daberaf@gmail.com) (AKT).  
35  
36  
37  
38  
39

40 **Strengths and limitation of the study**

- 41  
42  
43  
44  
45  
46  
47  
48  
49  
50  
51  
52  
53  
54  
55  
56  
57  
58  
59  
60
- The first study to apply the Robson classification to private hospitals in Ethiopia
  - Inclusion of all women who delivered in both facilities (CS and vaginal deliveries) during the study period helped us to indicate the Robson distribution as a whole and also among those who had CS.
  - Because routinely collected clinical data was used some sociodemographic variables of interest were missed.
  - The retrospective nature of the study may be prone to incomplete documentation.

## Abstract

**Objective:** Caesarean section (CS) rates in Ethiopian private hospitals are high compared to those in public facilities, and there are limited descriptions of the groups of women contributing to this high rate. The objective of this study was to describe the groups contributing to the increased CS rate using the Robson classification in two major private hospitals in eastern Ethiopia.

**Design:** Cross-sectional study.

**Setting:** Two major private hospitals in eastern Ethiopia.

**Participants:** All women who gave birth from January 09, 2019 to January 08, 2020 in two major private hospitals in eastern Ethiopia.

**Primary and secondary outcome measures:** Primary outcome: Robson ten group classification. Secondary outcomes: indications for CS as recorded in the medical files.

**Results:** Of 1203 births in both hospitals combined during the study period, 415 (34.5%) were by CS. Women with a uterine scar due to previous CS (group 5), single cephalic term multiparous women in spontaneous labor (group 3), and single cephalic term nulliparous women in spontaneous labor (group 1) were the leading groups contributing 33%, 27.5%, and 17.1%, respectively. The leading documented indications were fetal compromise (29.4%), previous CS (27.2%), and obstructed labor (12.3%).

**Conclusion:** Women in Robson group 5, 3, and 1 are contributing to more than three in four CSs major private hospitals in eastern Ethiopia. Improving management of spontaneous labor and strengthening clinical practice around safely providing the option of vaginal birth after CS practice are strategies required to reduce the high CS rate in these private facilities.

**Keywords:** Robson classification, private hospitals, caesarean section, audit, Ethiopia

## INTRODUCTION

Although caesarean section (CS) is a life-saving intervention when vaginal delivery has higher risk for the women or the newborn, there is no significant improvement in maternal and neonatal health outcomes when population-based CS rate is higher than 15% [1, 2]. From being performed to save the life of women or the neonate, CS is also being performed for non-absolute indications like maternal request or obstructed labor with intact membrane [3]. The overall CS rate in Ethiopia is one of the lowest (0.6%) with huge regional variation [4]. Moreover, CS rates significantly vary within and among countries, with women from urban, literates and those visiting private facilities having more CS compared to their counterparts [4, 5], Ethiopia is not.

With the unprecedented rise in caesarean section (CS) rates the need to institute a robust system to minimize unnecessary and medically nonindicated CS is warranted [6]. Risks associated with (repeated) CS for women and newborn are well established [7-9]. These range from increased risk of uterine rupture and abnormal placentation for the woman to stillbirth and iatrogenic preterm birth for the baby. Moreover, long term effect on hormonal, physical, bacterial, and physiological conditions and risk of allergic reactions on the newborn were also reported [9].

A recommended system for auditing clinical practice around CS is the Robson Ten Group Classification [9-11]. Based on obstetric history, course of labor and gestational age, the Robson classification categorizes all women undergoing CS into ten mutually exclusive and exhaustive groups [12-14]. Although the Robson classification has been promoted by the World Health Organization as a method to reduce CS rates [13, 15, 16], the system has rarely been applied to private facilities in Africa [17, 18].

Given the increase in global CS rates, including in low-and middle-income countries [2, 19-21] and in private facilities in particular, audit of CS practices and identifying groups contributing to CS rates using the Robson Classification are important to design appropriate interventions [17, 22-26]. To the best of our knowledge, no such study has been performed in private facilities in Ethiopia, rendering the contribution of different groups to overall CS rates in these institutions unknown [27, 28].



1  
2  
3 The aim of this study was to determine which groups are driving the CS rate in selected  
4 major private hospitals in eastern Ethiopia using the Robson Ten Group Classification  
5 system.  
6  
7  
8

## 9 **METHODS**

### 10 **Study designs and participants**

11  
12  
13  
14  
15 This study was conducted as part of a larger study on maternal near miss and mortality  
16 in major private hospitals in eastern Ethiopia, which has been described elsewhere  
17 [29]. In brief, all women who were admitted from January 09, 2019 to January 08, 2020  
18 in two major private hospitals in eastern Ethiopia during pregnancy, childbirth or within  
19 42 days of termination of pregnancy were identified. Then, all women who fulfilled the  
20 adapted sub-Saharan African maternal near miss criteria were identified [30]. Finally,  
21 data on sociodemographic conditions, reproductive and obstetric factors, and  
22 respective fetomaternal outcomes at discharge were collected from those identified  
23 as near miss or not (for comparison). The study was retrospectively conducted from  
24 February 1 to 29, 2020 at the department of obstetrics and gynaecology of Hospital 1  
25 and Hospital 2—the two major private hospitals in Harar and Dire Dawa towns, eastern  
26 Ethiopia. As part of this study, data on category of the pregnancy, presence of previous  
27 uterine scar, the course of labour and delivery, and the gestational age, which are  
28 essential for the Robson Classification [12], were collected from all women who gave  
29 birth. To enable comparisons, records of women who gave birth vaginally were also  
30 reviewed. The identity of all women who visited both hospitals for maternity services  
31 were obtained from the admission and discharge registers, delivery log books, and  
32 operation theatre registers. Using their medical registration number, all files were  
33 retrieved from the archive rooms at both hospitals and reviewed by research assistants  
34 who received dedicated in-service training.  
35  
36  
37  
38  
39  
40  
41  
42  
43  
44  
45  
46  
47  
48  
49  
50

### 51 **Study setting**

52  
53  
54 Hospital 1 is a general specialized 33-bed private hospital in Harar providing  
55 specialized care in internal medicine, surgery, obstetrics and gynecology, pediatrics  
56 and child health, and some other smaller fields. During the study period, five  
57 consultants and six midwives were practicing at the department of obstetrics. It  
58  
59  
60

provides care for both emergency and planned CS by consultants, with approximately 1000 births annually. Hospital 2 is one of the major private hospitals in Dire Dawa with almost 600 deliveries annually. Both hospitals have one major operation theatre which they share with all surgical specialties. Unlike public facilities, where all maternity services are free [31], a typical CS procedure costs 10,000-15,000 Ethiopian Birr (\$267-400).

## Variables

The dependent variable was the Robson classification groups, one to ten based on the category of the pregnancy, presence of previous uterine scar, the course of labour and delivery, and the gestational age of the pregnancy (Box 1) [12]. The independent variables included sociodemographic conditions (age, referral status, residence), medical and obstetric history and conditions present in the index pregnancy.

Box 1: Robson's ten group caesarean section classification system [12]

| Group | Description                                                                                        |
|-------|----------------------------------------------------------------------------------------------------|
| 1     | Nulliparous, single cephalic, $\geq 37$ weeks, in spontaneous labour                               |
| 2     | Nulliparous, single cephalic, $\geq 37$ weeks, induced or CS before labour                         |
| 3     | Multiparous (excluding previous CS), single cephalic, $\geq 37$ weeks, in spontaneous labour       |
| 4     | Multiparous (excluding previous CS), single cephalic, $\geq 37$ weeks, induced or CS before labour |
| 5     | Previous CS, single cephalic, $\geq 37$ weeks                                                      |
| 6     | All nulliparous breeches                                                                           |
| 7     | All multiparous breeches (including previous CS)                                                   |
| 8     | All multiple pregnancies (including previous CS)                                                   |
| 9     | All abnormal lies (including previous CS)                                                          |
| 10    | All single cephalic, $< 37$ weeks (including previous CS)                                          |

## Data collection

Trained research assistants collected data on maternal characteristics (age, parity, antenatal booking, referral status), obstetric and medical history and conditions (history of uterine scar, history or presence of obstetric complications), labor and delivery related information (onset, presentation, mode of birth, indication for CS for births by CS), fetal/neonatal information (vital status at birth, fifth minute APGAR score, admission to special intensive care unit, birth weight), and maternal and fetal outcome at discharge.

## Data processing and analysis

All collected data were cross-checked for completeness and consistency and double entered to EpiData 3.1 (<http://www.epidata.dk>) and exported to Stata 13 (<https://www.stata.com>) for analysis. The Robson group was determined using the four basic obstetric concepts and their parameters—pregnancy category, history of CS, course of labor and gestational age [12]. In addition, indications reported for CS were classified as absolute and non-absolute indications as per the recommendation by Stanton and Ronsmans [32]. Absolute indications include obstructed labor, major antepartum hemorrhage (including placenta previa grades 3 and 4), malpresentation (transverse, oblique, and brow presentation), and uterine rupture in hierarchical order. Non-absolute indications included previous history of CS, fetal compromise, failure to progress (prolonged labor, failed induction), breech, severe pre-eclampsia and eclampsia without hierarchical order.

### Patient and public involvement

Patients and/or the public were not involved in the design, or conduct, or reporting, or dissemination plans of this research.

## RESULTS

During the study period, 1287 maternity admissions were reported. After excluding 73 (5.7%) lost or incomplete files, 1214 records with complete data were reviewed constituting 1203 births (excluding abortions and laparotomies not resulting in births). A total of 415 births were by CS, making the overall CS rate 34.5% (277/839; 33% in hospital A and 138/364; 37.9% in hospital B). The mean age of participants was 26.7( $\pm$ 5.3) years ranging from 17 to 40. The mean gestational age was 38.9( $\pm$ 1.6) weeks. The majority of women were married (98.8%), urban residents (70.6%), and self-referred (94.9%). Details of sociodemographic conditions are summarized in Table 1.

Table 1: Sociodemographic conditions of women who underwent CS in selected private hospitals in eastern Ethiopia, 2020

| Variable         | Frequency | %    |
|------------------|-----------|------|
| <b>Age</b>       |           |      |
| <20              | 37        | 8.9  |
| 20-35            | 356       | 85.8 |
| >35              | 22        | 5.3  |
| <b>Residence</b> |           |      |

|                                     |     |      |
|-------------------------------------|-----|------|
| Urban                               | 293 | 70.6 |
| Rural                               | 122 | 29.4 |
| <b>Type of CS</b>                   |     |      |
| Elective                            | 85  | 20.5 |
| Emergency                           | 350 | 79.5 |
| <b>Referral status</b>              |     |      |
| Self-referral                       | 394 | 94.9 |
| Referred from other facilities      | 21  | 5.1  |
| <b>Antenatal care (at least 1)</b>  |     |      |
| Yes                                 | 387 | 93.3 |
| No                                  | 28  | 6.7  |
| <b>Parity</b>                       |     |      |
| 0                                   | 95  | 22.9 |
| 1-4                                 | 285 | 68.7 |
| >4                                  | 35  | 8.4  |
| <b>Gestational age (weeks) [33]</b> |     |      |
| Preterm (<37)                       | 9   | 2.2  |
| Term (37-41 6/7)                    | 400 | 96.4 |
| Post term ( $\geq$ 42)              | 6   | 1.4  |
| <b>Onset of labor</b>               |     |      |
| Spontaneous                         | 285 | 68.7 |
| Induced                             | 24  | 5.8  |
| CS before labor                     | 106 | 25.5 |
| <b>Fetal presentation</b>           |     |      |
| Cephalic                            | 393 | 94.7 |
| Breech                              | 18  | 4.3  |
| Transverse                          | 4   | 1    |
| <b>Birth weight (gram)</b>          |     |      |
| <2500                               | 12  | 2.9  |
| 2500-4000                           | 393 | 94.7 |
| >4000                               | 10  | 2.4  |

CS, cesarean section

### Analysis of the Robson classification

The three leading Robson groups were Robson group 5 (n=137;33%), 3 (n=114; 27.5%) and 1 (n=71;17.1%). The overall contribution of the 'high risk groups' (group 6, 7,8, and 9) to the overall CS rate was almost nil (6.2%). Details of the Robson groups and their respective contributions are summarized in Figure 1 and Table 2.

Figure 1: Distribution of women undergoing CS according to the Robson groups in selected private hospitals in eastern Ethiopia, 2020.

Table 2: Distribution of Robson groups and their contribution to the overall CS rate in selected private hospitals in eastern Ethiopia, 2020.

| Group | Description                                                         | CS/all births in the group | Contribution per group to total births (%) | CS rate within group (%) | Contribution per group to the CS rate (%) |
|-------|---------------------------------------------------------------------|----------------------------|--------------------------------------------|--------------------------|-------------------------------------------|
| 1     | Nulliparous, single cephalic, $\geq$ 37 weeks, in spontaneous labor | 71/197                     | 16.4                                       | 36.0                     | 17.1                                      |

|    |                                                                                                |                 |            |             |            |
|----|------------------------------------------------------------------------------------------------|-----------------|------------|-------------|------------|
| 2  | Nulliparous, single cephalic, $\geq 37$ weeks, induced or CS before labor                      | 19/27           | 2.2        | 70.4        | 4.6        |
| 3  | Multiparous (excluding prev. CS), single cephalic, $\geq 37$ weeks, in spontaneous labor       | 114/690         | 57.4       | 16.5        | 27.5       |
| 4  | Multiparous (excluding prev. CS), single cephalic, $\geq 37$ weeks, induced or CS before labor | 39/72           | 6.0        | 54.2        | 9.4        |
| 5  | Previous CS, single cephalic, $\geq 37$ weeks                                                  | 137/153         | 12.7       | 89.5        | 33.0       |
| 6  | All nulliparous breeches                                                                       | 1/1             | 0.1        | 100         | 0.24       |
| 7  | All multiparous breeches                                                                       | 13/22           | 1.8        | 59.1        | 3.1        |
| 8  | All multiple pregnancies (including prev. CS)                                                  | 9/15            | 1.2        | 60          | 2.2        |
| 9  | All abnormal lies (including prev. CS)                                                         | 3/3             | 0.3        | 100         | 0.7        |
| 10 | All single cephalic, $\leq 36$ weeks (including prev. CS)                                      | 9/23            | 1.9        | 39.1        | 2.2        |
|    | <b>Total</b>                                                                                   | <b>415/1203</b> | <b>100</b> | <b>34.5</b> | <b>100</b> |

### Overall and within group indication for CS

As indicated in Figure 2, the leading indications for performing CS in this study were fetal compromise (29.4%), previous CS (27.2%), and obstructed labor (12.3%). In general, CS was performed for absolute indications in 24.1% only (Figure 2).

Figure 2: Indications for performing CS in selected private hospitals in eastern Ethiopia, 2020.

Major indications within each Robson group are summarized in Table 3. Except for Robson groups 9 and 10 where malpresentation ( $n=3/3$ ) and major APH ( $n=5/9$ ) were leading indications, non-absolute indications were the main indications in all other groups: fetal compromise in Groups 1 ( $n=40/71$ ; 56.3%) and 3 ( $n=68/114$ ; 59.6%); previous CS in Group 5 ( $n=106/137$ ; 77.4%); breech presentation in Group 6 ( $n=1/1$ ; 100%), Group 7 ( $n=10/13$ ; 76.9%), Group 8 ( $n=4/9$ ; 44.4%).

Table 3: Overall and within Robson group indications for performing CS in selected private hospitals in eastern Ethiopia, 2020.

| indications                 | Group 1   | Group 2 | Group 3 | Group 4 | Group 5 | Group 6 | Group 7 | Group 8 | Group 9 | Group 10 | Total |
|-----------------------------|-----------|---------|---------|---------|---------|---------|---------|---------|---------|----------|-------|
| <b>Absolute indications</b> |           |         |         |         |         |         |         |         |         |          |       |
| Obstructed labor            | 19 (26.8) | 2       | 24      | 2       | 4       | 0       | 0       | 0       | 0       | 0        | 51    |
| Major APH                   | 2         | 1       | 14      | 6       | 9       | 0       | 0       | 0       | 0       | 5 (55.6) | 37    |
| Malpresentation             | 0         | 0       | 0       | 0       | 0       | 0       | 0       | 2       | 3 (100) | 0        | 5     |
| Uterine rupture             | 0         | 0       | 0       | 0       | 7       | 0       | 0       | 0       | 0       | 0        | 7     |

| Non-absolute indications |           |           |            |           |            |          |           |          |          |          |            |
|--------------------------|-----------|-----------|------------|-----------|------------|----------|-----------|----------|----------|----------|------------|
| Previous CS              | 0         | 0         | 2          | 2         | 106 (77.4) | 0        | 2         | 1        | 0        | 0        | 113        |
| Fetal compromise         | 40 (56.3) | 0         | 68 (59.6)  | 4         | 5          | 0        | 1         | 1        | 0        | 3        | 122        |
| Failure to progress      | 4         | 6         | 1          | 13        | 1          | 0        | 0         | 0        | 0        | 0        | 25         |
| Breech                   | 0         | 0         | 0          | 0         | 0          | 1 (100)  | 10 (76.9) | 4 (44.4) | 0        | 0        | 15         |
| (Severe pre-) eclampsia  | 5         | 2         | 4          | 1         | 3          | 0        | 0         | 0        | 0        | 1        | 16         |
| Others                   | 1         | 8         | 1          | 11        | 2          | 0        | 0         | 1        | 0        | 0        | 24*        |
| <b>Total</b>             | <b>71</b> | <b>19</b> | <b>114</b> | <b>39</b> | <b>137</b> | <b>1</b> | <b>13</b> | <b>9</b> | <b>3</b> | <b>9</b> | <b>415</b> |

APH, antepartum hemorrhage; CS, caesarean section; \*18 on maternal requests and 6 unspecified

## DISCUSSION

This study was conducted to describe CS in selected private hospitals using the Robson classification. We found that women with a history of CS in a previous pregnancy (Group 5), single cephalic multiparous women at term in spontaneous labour with no previous history of CS (Group 3), and single cephalic nulliparous women at term and in spontaneous labour (Group 1) were the leading Robson groups contributing to eight in ten CS. In addition, the relatively moderate risk groups (Groups 1 to 4 combined), contributed to 58.6% of all CS in the participating private hospitals. The leading recorded indications for performing CS were fetal compromise, previous CS, and obstructed labor. Although the application of Robson classification for auditing CS is common practice, to the best of our knowledge, this is only the second reported study to apply this classification to private hospitals in a low-and middle-income country after the study by Begum et al in Bangladesh [18].

Looking into the quality of data as per the WHO recommendation [13], shows good quality of data. The size of group 9 is in the expected range of <1% (0.3) with overall CS rate of 100%. In addition, looking into relative size of combination of 'group 1 and 2' (18.6%), and 'group 3 and 4' (63.3%) in Table 2 (column 3) shows the presence of high multiparous women in the database, as evidence by high total fertility rate (4.6) in the country [34]. It may also reflect high vaginal delivery among women without prior scars. Furthermore, the ratio of 'group 3 to 4' is higher than the ratio of 'group 1 to 2' indicating good quality of data [13]. However, the ratio of 'group 6 to 7' was very low (0.05) compared to the expected high breeches among nulliparas compared to

1  
2  
3 multipara. Given the quality of our data is acceptable as indicated by other parameters  
4 above, this requires further audit.  
5  
6

7  
8 Given that groups 5, 3 and 1 constitute large demographic shares, it was expected  
9 that these would contribute largely to the overall CS. However, the fact that CS rates  
10 within these groups were 89.5%,16.5%, and 36.0%, respectively indicates vast  
11 opportunities to reduce CS rates by strengthening clinical practice around vaginal  
12 birth, including vaginal birth after CS. The numbers do raise concerns about quality of  
13 care around vaginal birth in private care facilities in Ethiopia. Although group 5  
14 comprised 12.5% of all births, it contributed 33% to the overall CS rate—possibly  
15 indicating low utilization of trial of labor or instrumental vaginal birth. Trial of labor in  
16 sub-Saharan Africa in general is low [35] although this practice may be justified in a  
17 majority of women with a previous scar if combined with proper labor monitoring [36].  
18  
19  
20  
21  
22  
23  
24  
25

## 26 **Strengths and limitations**

27  
28  
29 This study is the first study to apply the Robson classification to major private hospitals  
30 in Ethiopia. Inclusion of all women who gave birth in both facilities (CS and vaginal  
31 deliveries) during the study period helped us to indicate the Robson distribution as a  
32 whole and also among those who had CS without selection bias. However, the study  
33 has some limitations to be considered. *First*, as the data were retrospectively collected  
34 from medical records, some important socio-economic variables—which are not  
35 routinely documented—were missed. *Second*, data on trial of labor or partograph use  
36 is not often documented making it difficult to comment on management of labor and  
37 timeliness of the decisions to undergo CS.  
38  
39  
40  
41  
42  
43  
44  
45

## 46 **CONCLUSION**

47  
48  
49 More than three-fourth of CS was performed among Robson groups 5, 3, and 1—  
50 indicating inadequate trial of labour after CS or management of labor among relatively  
51 low risk groups (3 and 1). Although the overall CS rate in this study is not as high as  
52 those reported in private hospitals in some other clinics, it requires further study since  
53 a majority (68%) of women who undergone CS did not have any underlying obstetric  
54 complications [37]. In addition, the high CS rate among women with a scarred uterus  
55 (89.2%) requires further audit of obstetric interventions provided to these women.  
56  
57  
58  
59  
60

1  
2  
3 Since these private hospitals are well equipped with fetal monitoring and the ability to  
4 perform CS quickly, trial of labor after CS should be attempted and the missed  
5 opportunities should be further explored.  
6  
7

## 8 9 **Declarations**

10  
11  
12 **Acknowledgements** We want to thank the hospital managers for allowing us to  
13 conduct this study in their respective hospitals.  
14

15  
16 **Contributors** AKT conceived the study and wrote the original draft of the manuscript  
17 which was subsequently reviewed by SG, SGF, and TvdA. SG was involved in  
18 proposal development and collected data under the supervision and mentorship of  
19 AKT. Analysis was done by AKT. SG, SGF, and TvdA reviewed the manuscript for  
20 intellectual content and participated in revision. All authors contributed to the writing  
21 and reviewed the article and approved the final version of the manuscript to be  
22 published.  
23

24  
25 **Funding** SG received a grant from Haramaya University for his MSc study (grant  
26 number: not applicable).  
27

28  
29 **Disclaimer** The funding organisation has no role in the design, execution or decision  
30 to publish the study.  
31

32  
33 **Competing interests** None declared.  
34

35  
36 **Patient consent** Not required.  
37

38  
39 **Ethics approval** This study was approved by the institutional health research  
40 ethics review committee of College of Health and Medical Sciences, Haramaya  
41 University, Ethiopia (IHRERC/045/2020).  
42  
43

44  
45 **Data sharing statement** Data essential for conclusion are included in the manuscript.  
46 Additional data can be obtained from the corresponding author on reasonable request.  
47  
48  
49  
50

## 51 **REFERENCES**

52  
53  
54 1 World Health Organization. World health statistics 2015: World Health  
55 Organization 2015.  
56

57  
58 2 Betrán AP, Ye J, Moller AB, et al. The Increasing Trend in Caesarean Section  
59 Rates: Global, Regional and National Estimates: 1990-2014, *PLoS One* 2016;11:  
60 e0148343.



- 1  
2  
3 Rijken MJ, Meguid T, van den Akker T, et al. Global surgery and the dilemma for  
4 obstetricians, *Lancet* 2015;386:1941-2.  
5
- 6  
7 4 Fesseha N, Getachew A, Hiluf M, et al. A national review of cesarean delivery in  
8 Ethiopia, *Int J Gynaecol Obstet* 2011;115:106-11.  
9
- 10  
11 5 Boatin AA, Schlottheuber A, Betran AP, et al. Within country inequalities in  
12 caesarean section rates: observational study of 72 low and middle income countries,  
13 *BMJ* 2018;360.  
14
- 15  
16 6 Betrán AP, Merialdi M, Lauer JA, et al. Rates of caesarean section: analysis of  
17 global, regional and national estimates, *Paediatr Perinat Epidemiol* 2007;21:98-113.  
18
- 19  
20 7 Keag OE, Norman JE, Stock SJ. Long-term risks and benefits associated with  
21 cesarean delivery for mother, baby, and subsequent pregnancies: Systematic review  
22 and meta-analysis, *PLoS Med* 2018;15: e1002494.  
23
- 24  
25 8 Masukume G, McCarthy FP, Russell J, et al. Caesarean section delivery and  
26 childhood obesity: evidence from the growing up in New Zealand cohort, *J Epidemiol  
27 Community Health* 2019;73:1063-70.  
28
- 29  
30 9 Sandall J, Tribe RM, Avery L, et al. Short-term and long-term effects of caesarean  
31 section on the health of women and children, *Lancet* 2018;392:1349-57.  
32
- 33  
34 10 Betrán AP, Vindevoghel N, Souza JP, et al. A systematic review of the Robson  
35 classification for caesarean section: what works, doesn't work and how to improve it,  
36 *PLoS One* 2014;9: e97769.  
37
- 38  
39 11 Le Ray C, Blondel B, Prunet C, et al. Stabilising the caesarean rate: which target  
40 population? *BJOG* 2015; 122:690-9.  
41
- 42  
43 12 Robson MS. Can we reduce the caesarean section rate? *Best Pract Res Clin  
44 Obstet Gynaecol* 2001; 15:179-94.  
45
- 46  
47 13 World Health Organization. Robson classification: implementation manual, 2017.  
48
- 49  
50 14 Robson M. The Ten Group Classification System (TGCS) - a common starting  
51 point for more detailed analysis, *BJOG* 2015;122:701,0528.13267.  
52
- 53  
54 15 Alonso BD, Silva, F. M. B. D., Latorre, M. D. R. D. O., et al. Caesarean birth rates  
55 in public and privately funded hospitals: a cross-sectional study, *Rev Saude Publica*  
56 2017;51:101,8787.2017051007054.  
57
- 58  
59 16 Hoxha I, Syrogiannouli L, Luta X, et al. Caesarean sections and for-profit status of  
60 hospitals: systematic review and meta-analysis, *BMJ Open* 2017;7: e013670.  
61
- 62  
63 17 Atnurkar KB, Mahale AR. Audit of Caesarean Section Births in Small Private  
64 Maternity Homes: Analysis of 15-Year Data Applying the Modified Robson Criteria,  
65 Canada, *J Obstet Gynaecol India* 2016;66:289-94.  
66

1  
2  
3 18 Begum T, Nababan H, Rahman A, et al. Monitoring caesarean births using the  
4 Robson ten group classification system: A cross-sectional survey of private for-profit  
5 facilities in urban Bangladesh, *PLoS One* 2019;14:e0220693.  
6

7  
8 19 Cavallaro FL, Cresswell JA, França GV, et al. Trends in caesarean delivery by  
9 country and wealth quintile: cross-sectional surveys in southern Asia and sub-  
10 Saharan Africa, *Bull World Health Organ* 2013;91:914-922D.  
11

12  
13 20 Hanson C, Betrán AP, Opondo C, et al. Trends in caesarean section rates  
14 between 2007 and 2013 in obstetric risk groups inspired by the Robson  
15 classification: results from population-based surveys in a low-resource setting, *BJOG*  
16 2019;126:690-700.  
17

18  
19 21 Harrison MS, Saleem S, Ali S, et al. A Prospective, Population-Based Study of  
20 Trends in Operative Vaginal Delivery Compared to Cesarean Delivery Rates in Low-  
21 and Middle-Income Countries, 2010-2016, *Am J Perinatol* 2019;36:730-6.  
22

23  
24 22 Chanrachakul B, Herabutya Y, Udomsubpayakul U. Epidemic of cesarean section  
25 at the general, private and university hospitals in Thailand, *J Obstet Gynaecol Res*  
26 2000;26:357-61.  
27

28  
29 23 Phadungkiatwattana P, Tongsakul N. Analyzing the impact of private service on  
30 the cesarean section rate in public hospital Thailand, *Arch Gynecol Obstet*  
31 2011;284:1375-9.  
32

33  
34 24 Einarsdóttir K, Haggard F, Pereira G, et al. Role of public and private funding in the  
35 rising caesarean section rate: a cohort study, *BMJ Open* 2013;3: e002789.  
36

37  
38 25 Dahlen HG, Tracy S, Tracy M, et al. Rates of obstetric intervention among low-  
39 risk women giving birth in private and public hospitals in NSW: a population-based  
40 descriptive study, *BMJ Open* 2012;2: e001723.  
41

42  
43 26 Ali Y, Khan MW, Mumtaz U, et al. Identification of factors influencing the rise of  
44 cesarean sections rates in Pakistan, using MCDM, *Int J Health Care Qual Assur*  
45 2018;31:1058-69.  
46

47  
48 27 Gebremedhin S. Trend and socio-demographic differentials of Caesarean section  
49 rate in Addis Ababa, Ethiopia: analysis based on Ethiopia demographic and health  
50 surveys data, *Reprod Health* 2014;11:14.  
51

52  
53 28 Tura AK, Pijpers O, de Man M, et al. Analysis of caesarean sections using  
54 Robson 10-group classification system in a university hospital in eastern Ethiopia: a  
55 cross-sectional study, *BMJ Open* 2018;8:e020520.  
56

57  
58 29 Tenaw SG, Assefa N, Mulatu T, et al. Maternal near miss among women  
59 admitted in major private hospitals in eastern Ethiopia: a retrospective study, *BMC*  
60 *Pregnancy and Childbirth* 2021;21:1-9.

1  
2  
3 30 Tura AK, Stekelenburg J, Scherjon SA, et al. Adaptation of the WHO maternal  
4 near miss tool for use in sub-Saharan Africa: An International Delphi study, *BMC*  
5 *Pregnancy Childbirth* 2017;17:445.  
6

7  
8 31 Pearson L, Gandhi M, Admasu K, et al. User fees and maternity services in  
9 Ethiopia, *Int J Gynaecol Obstet* 2011;115:310-5.  
10

11 32 Stanton C, Ronsmans C, Baltimore Group on Cesarean. Recommendations for  
12 routine reporting on indications for cesarean delivery in developing countries, *Birth*  
13 2008;35:204-11.  
14

15  
16 33 World Health Organization. ICD-10:International Statistical Classification of  
17 Diseases and Related Health Problems 2010:151-2.  
18

19 34 CSACE I. Ethiopia Demographic and Health Survey 2016, *Addis Ababa, Ethiopia,*  
20 *and Rockville, Maryland, USA: CSA and ICF* 2016.  
21

22  
23 35 Boulvain M, Fraser WD, Brisson-Carroll G, et al. Trial of labour after caesarean  
24 section in sub-Saharan Africa: a meta-analysis, *Br J Obstet Gynaecol*  
25 1997;104:1385-90.  
26

27 36 van Roosmalen J. Vaginal birth after cesarean section in rural Tanzania, *Int J*  
28 *Gynaecol Obstet* 1991;34:211-5.  
29

30  
31 37 Bishop D, Dyer RA, Maswime S, et al. Maternal and neonatal outcomes after  
32 caesarean delivery in the African Surgical Outcomes Study: a 7-day prospective  
33 observational cohort study, *The Lancet Global Health* 2019;7:e513-22  
34  
35  
36  
37  
38  
39  
40  
41  
42  
43  
44  
45  
46  
47  
48  
49  
50  
51  
52  
53  
54  
55  
56  
57  
58  
59  
60

1 Figure 1



28 Figure 1: Distribution of women undergoing CS according to the Robson groups in selected private hospitals in  
29 eastern Ethiopia, 2020.

1 Figure 2

2  
3  
4  
5  
6  
7  
8  
9  
10  
11  
12  
13  
14  
15  
16  
17  
18  
19  
20  
21  
22  
23  
24  
25  
26  
27  
28  
29  
30  
31  
32  
33  
34  
35  
36  
37  
38  
39  
40  
41  
42  
43  
44  
45  
46  
47  
48  
49  
50  
51  
52  
53  
54  
55  
56  
57  
58  
59  
60



Figure 2: Indications for performing CS in selected private hospitals in eastern Ethiopia, 2020.

**STROBE 2007 (v4) Statement—Checklist of items that should be included in reports of *cross-sectional studies***

| Section/Topic                | Item # | Recommendation                                                                                                                                                                       | Reported on page # |
|------------------------------|--------|--------------------------------------------------------------------------------------------------------------------------------------------------------------------------------------|--------------------|
| <b>Title and abstract</b>    | 1      | (a) Indicate the study's design with a commonly used term in the title or the abstract                                                                                               | 1                  |
|                              |        | (b) Provide in the abstract an informative and balanced summary of what was done and what was found                                                                                  | 2                  |
| <b>Introduction</b>          |        |                                                                                                                                                                                      |                    |
| Background/rationale         | 2      | Explain the scientific background and rationale for the investigation being reported                                                                                                 | 3                  |
| Objectives                   | 3      | State specific objectives, including any prespecified hypotheses                                                                                                                     | 3                  |
| <b>Methods</b>               |        |                                                                                                                                                                                      |                    |
| Study design                 | 4      | Present key elements of study design early in the paper                                                                                                                              | 4-5                |
| Setting                      | 5      | Describe the setting, locations, and relevant dates, including periods of recruitment, exposure, follow-up, and data collection                                                      | 4                  |
| Participants                 | 6      | (a) Give the eligibility criteria, and the sources and methods of selection of participants                                                                                          | 5                  |
| Variables                    | 7      | Clearly define all outcomes, exposures, predictors, potential confounders, and effect modifiers. Give diagnostic criteria, if applicable                                             | 5                  |
| Data sources/<br>measurement | 8*     | For each variable of interest, give sources of data and details of methods of assessment (measurement). Describe comparability of assessment methods if there is more than one group | 5                  |
| Bias                         | 9      | Describe any efforts to address potential sources of bias                                                                                                                            | na                 |
| Study size                   | 10     | Explain how the study size was arrived at                                                                                                                                            | 5                  |
| Quantitative variables       | 11     | Explain how quantitative variables were handled in the analyses. If applicable, describe which groupings were chosen and why                                                         | 5                  |
| Statistical methods          | 12     | (a) Describe all statistical methods, including those used to control for confounding                                                                                                | 5                  |
|                              |        | (b) Describe any methods used to examine subgroups and interactions                                                                                                                  | na                 |
|                              |        | (c) Explain how missing data were addressed                                                                                                                                          | na                 |
|                              |        | (d) If applicable, describe analytical methods taking account of sampling strategy                                                                                                   | na                 |
|                              |        | (e) Describe any sensitivity analyses                                                                                                                                                | na                 |
| <b>Results</b>               |        |                                                                                                                                                                                      |                    |

|                          |     |                                                                                                                                                                                                              |     |
|--------------------------|-----|--------------------------------------------------------------------------------------------------------------------------------------------------------------------------------------------------------------|-----|
| Participants             | 13* | (a) Report numbers of individuals at each stage of study—eg numbers potentially eligible, examined for eligibility, confirmed eligible, included in the study, completing follow-up, and analysed            | 6   |
|                          |     | (b) Give reasons for non-participation at each stage                                                                                                                                                         | 6   |
|                          |     | (c) Consider use of a flow diagram                                                                                                                                                                           | 6   |
| Descriptive data         | 14* | (a) Give characteristics of study participants (eg demographic, clinical, social) and information on exposures and potential confounders                                                                     | 6   |
|                          |     | (b) Indicate number of participants with missing data for each variable of interest                                                                                                                          | na  |
| Outcome data             | 15* | Report numbers of outcome events or summary measures                                                                                                                                                         | 7-9 |
| Main results             | 16  | (a) Give unadjusted estimates and, if applicable, confounder-adjusted estimates and their precision (eg, 95% confidence interval). Make clear which confounders were adjusted for and why they were included | 7-9 |
|                          |     | (b) Report category boundaries when continuous variables were categorized                                                                                                                                    | na  |
|                          |     | (c) If relevant, consider translating estimates of relative risk into absolute risk for a meaningful time period                                                                                             | na  |
| Other analyses           | 17  | Report other analyses done—eg analyses of subgroups and interactions, and sensitivity analyses                                                                                                               | na  |
| <b>Discussion</b>        |     |                                                                                                                                                                                                              |     |
| Key results              | 18  | Summarise key results with reference to study objectives                                                                                                                                                     | 9   |
| Limitations              | 19  | Discuss limitations of the study, taking into account sources of potential bias or imprecision. Discuss both direction and magnitude of any potential bias                                                   | 10  |
| Interpretation           | 20  | Give a cautious overall interpretation of results considering objectives, limitations, multiplicity of analyses, results from similar studies, and other relevant evidence                                   | 10  |
| Generalisability         | 21  | Discuss the generalisability (external validity) of the study results                                                                                                                                        | 10  |
| <b>Other information</b> |     |                                                                                                                                                                                                              |     |
| Funding                  | 22  | Give the source of funding and the role of the funders for the present study and, if applicable, for the original study on which the present article is based                                                | 10  |

\*Give information separately for cases and controls in case-control studies and, if applicable, for exposed and unexposed groups in cohort and cross-sectional studies.

**Note:** An Explanation and Elaboration article discusses each checklist item and gives methodological background and published examples of transparent reporting. The STROBE checklist is best used in conjunction with this article (freely available on the Web sites of PLoS Medicine at <http://www.plosmedicine.org/>, Annals of Internal Medicine at <http://www.annals.org/>, and Epidemiology at <http://www.epidem.com/>). Information on the STROBE Initiative is available at [www.strobe-statement.org](http://www.strobe-statement.org).

# BMJ Open

## Can the Robson Ten Group Classification System help identify which groups of women are driving the high caesarean section rate in major private hospitals in Eastern Ethiopia? A cross-sectional study

|                                 |                                                                                                                                                                                                                                                                                                                                                                             |
|---------------------------------|-----------------------------------------------------------------------------------------------------------------------------------------------------------------------------------------------------------------------------------------------------------------------------------------------------------------------------------------------------------------------------|
| Journal:                        | <i>BMJ Open</i>                                                                                                                                                                                                                                                                                                                                                             |
| Manuscript ID                   | bmjopen-2020-047206.R2                                                                                                                                                                                                                                                                                                                                                      |
| Article Type:                   | Original research                                                                                                                                                                                                                                                                                                                                                           |
| Date Submitted by the Author:   | 06-Jul-2021                                                                                                                                                                                                                                                                                                                                                                 |
| Complete List of Authors:       | Geze, Shegaw; Wolkite University, Department of Midwifery Tura, Abera Kenay; Haramaya University, Nursing and Midwifery; University Medical Centre Groningen, Obstetrics and Gynaecology Fage, Sagni Girma; Haramaya University College of Health and Medical Sciences<br>van den Akker, Thomas; Leiden University Medical Center, Secretariat K6, Department of Obstetrics |
| <b>Primary Subject Heading</b>: | Obstetrics and gynaecology                                                                                                                                                                                                                                                                                                                                                  |
| Secondary Subject Heading:      | Epidemiology, Global health, Health services research, Public health                                                                                                                                                                                                                                                                                                        |
| Keywords:                       | OBSTETRICS, EPIDEMIOLOGY, AUDIT, PUBLIC HEALTH                                                                                                                                                                                                                                                                                                                              |
|                                 |                                                                                                                                                                                                                                                                                                                                                                             |

SCHOLARONE™  
Manuscripts





I, the Submitting Author has the right to grant and does grant on behalf of all authors of the Work (as defined in the below author licence), an exclusive licence and/or a non-exclusive licence for contributions from authors who are: i) UK Crown employees; ii) where BMJ has agreed a CC-BY licence shall apply, and/or iii) in accordance with the terms applicable for US Federal Government officers or employees acting as part of their official duties; on a worldwide, perpetual, irrevocable, royalty-free basis to BMJ Publishing Group Ltd ("BMJ") its licensees and where the relevant Journal is co-owned by BMJ to the co-owners of the Journal, to publish the Work in this journal and any other BMJ products and to exploit all rights, as set out in our [licence](#).

The Submitting Author accepts and understands that any supply made under these terms is made by BMJ to the Submitting Author unless you are acting as an employee on behalf of your employer or a postgraduate student of an affiliated institution which is paying any applicable article publishing charge ("APC") for Open Access articles. Where the Submitting Author wishes to make the Work available on an Open Access basis (and intends to pay the relevant APC), the terms of reuse of such Open Access shall be governed by a Creative Commons licence – details of these licences and which [Creative Commons](#) licence will apply to this Work are set out in our licence referred to above.

Other than as permitted in any relevant BMJ Author's Self Archiving Policies, I confirm this Work has not been accepted for publication elsewhere, is not being considered for publication elsewhere and does not duplicate material already published. I confirm all authors consent to publication of this Work and authorise the granting of this licence.

1  
2  
3 **Can the Robson Ten Group Classification System help identify which groups**  
4 **of women are driving the high caesarean section rate in major private**  
5 **hospitals in Eastern Ethiopia? A cross-sectional study**  
6  
7  
8  
9

10 Shegaw Geze<sup>1,2</sup>, Abera Kenay Tura<sup>2,3\*</sup>, Sagni Girma Fage<sup>2</sup>, Thomas van den  
11 Akker<sup>4,5</sup>  
12  
13

14  
15 <sup>1</sup>Department of midwifery, College of Health and Medical Sciences, Wolkite  
16 University, Wolkite, Ethiopia

17  
18 <sup>2</sup>School of nursing and midwifery, College of Health and Medical Sciences,  
19 Haramaya University, Harar, Ethiopia

20  
21 <sup>3</sup>Department of obstetrics and gynaecology, University Medical Centre Groningen,  
22 University of Groningen, Groningen, the Netherlands

23  
24 <sup>4</sup>Department of obstetrics and gynaecology, Leiden University Medical Centre,  
25 Leiden, the Netherlands

26  
27 <sup>5</sup>Athena Institute, Vrije Universiteit Amsterdam, Amsterdam, the Netherlands  
28  
29

30  
31  
32 **\*Correspondence:**

33 School of nursing and midwifery, College of health and medical sciences, Haramaya  
34 University, Harar, Ethiopia; [daberaf@gmail.com](mailto:daberaf@gmail.com) (AKT).  
35  
36  
37  
38

39  
40 **Strengths and limitation of the study**

- 41  
42  
43  
44  
45  
46  
47  
48  
49  
50  
51  
52  
53  
54  
55  
56  
57  
58  
59  
60
- The first study to apply the Robson classification to private hospitals in Ethiopia
  - Because routinely collected clinical data was used some sociodemographic variables of interest were missed.
  - The retrospective nature of the study may be prone to incomplete documentation.

## Abstract

**Objective:** Caesarean section (CS) rates in Ethiopian private hospitals are high compared to those in public facilities, and there are limited descriptions of the groups of women contributing to this high rate. The objective of this study was to describe the groups contributing to the increased CS rate using the Robson classification in two major private hospitals in eastern Ethiopia.

**Design:** Cross-sectional study.

**Setting:** Two major private hospitals in eastern Ethiopia.

**Participants:** All women who gave birth from January 09, 2019 to January 08, 2020 in two major private hospitals in eastern Ethiopia.

**Primary and secondary outcome measures:** Primary outcome: Robson ten group classification. Secondary outcomes: indications for CS as recorded in the medical files.

**Results:** Of 1203 births in both hospitals combined during the study period, 415 (34.5%) were by CS. Women with a uterine scar due to previous CS (group 5), single cephalic term multiparous women in spontaneous labor (group 3), and single cephalic term nulliparous women in spontaneous labor (group 1) were the leading groups contributing 33%, 27.5%, and 17.1%, respectively. The leading documented indications were fetal compromise (29.4%), previous CS (27.2%), and obstructed labor (12.3%).

**Conclusion:** More than three-fourth of CS was performed among Robson groups 5, 3, and 1—indicating inadequate trial of labour after CS or management of labor among relatively low risk groups (3 and 1). Improving management of spontaneous labor and strengthening clinical practice around safely providing the option of vaginal birth after CS practice are strategies required to reduce the high CS rate in these private facilities.

**Keywords:** Robson classification, private hospitals, caesarean section, audit, Ethiopia

## INTRODUCTION

Although caesarean section (CS) is a life-saving intervention when vaginal delivery has higher risk for the women or the newborn, there is no significant improvement in maternal and neonatal health outcomes when the population-based CS rate is higher than 15% [1, 2]. From being performed to save the life of women or the neonate, CS is also being performed for non-absolute indications like maternal request or obstructed labor with intact membrane [3]. The overall CS rate in Ethiopia is one of the lowest (0.6%) with huge regional variation [4]. Moreover, CS rates significantly vary within and among countries, with women from urban, literates and those visiting private facilities having more CS compared to their counterparts [4, 5].

With the unprecedented rise in caesarean section (CS) rates the need to institute a robust system to minimize unnecessary and medically nonindicated CS is warranted [6]. Risks associated with (repeated) CS for women and newborn are well established [7-9]. These range from increased risk of uterine rupture and abnormal placentation for the woman to stillbirth and iatrogenic preterm birth for the baby. Moreover, long term effect on hormonal, physical, bacterial, and physiological conditions and risk of allergic reactions on the newborn were also reported [9].

A recommended system for clinical auditing of CS is the Robson Ten Group Classification [9-11]. Based on obstetric history, course of labor and gestational age, the Robson classification categorizes all women undergoing CS into ten mutually exclusive and exhaustive groups [12-14]. Although the Robson classification has been promoted by the World Health Organization as a method to reduce CS rates [13, 15, 16], the system has rarely been applied to private facilities in Africa [17, 18].

Given the increase in global CS rates, including in low-and middle-income countries [2, 19-21] and in private facilities in particular, audit of CS practices and identifying groups contributing to CS rates using the Robson Classification are important to design appropriate interventions [17, 22-26]. To the best of our knowledge, no such study has been performed in private facilities in Ethiopia, rendering the contribution of different groups to overall CS rates in these institutions unknown [27, 28].

1  
2  
3 The aim of this study was to determine which groups are driving the CS rate in selected  
4 major private hospitals in eastern Ethiopia using the Robson Ten Group Classification  
5 system.  
6  
7  
8

## 9 **METHODS**

### 10 **Study designs and participants**

11  
12  
13  
14  
15 This study was conducted as part of a larger study on maternal near miss and mortality  
16 in major private hospitals in eastern Ethiopia, which has been described elsewhere  
17 [29]. In brief, all women who were admitted from January 09, 2019 to January 08, 2020  
18 in two major private hospitals in eastern Ethiopia during pregnancy, childbirth or within  
19 42 days of termination of pregnancy were identified. Then, all women who fulfilled the  
20 adapted sub-Saharan African maternal near miss criteria were identified [30]. Finally,  
21 data on sociodemographic conditions, reproductive and obstetric factors, and  
22 respective fetomaternal outcomes at discharge were collected from those identified  
23 as near miss or not (for comparison). The study was retrospectively conducted from  
24 February 1 to 29, 2020 at the department of obstetrics and gynaecology of Hospital 1  
25 and Hospital 2—the two major private hospitals in Harar and Dire Dawa towns, eastern  
26 Ethiopia. As part of this study, data on category of the pregnancy, presence of previous  
27 uterine scar, the course of labour and delivery, and the gestational age, which are  
28 essential for the Robson Classification [12], were collected from all women who gave  
29 birth. To enable comparisons, records of women who gave birth vaginally were also  
30 reviewed. The identity of all women who visited both hospitals for maternity services  
31 were obtained from the admission and discharge registers, delivery log books, and  
32 operation theatre registers. Using their medical registration number, all files were  
33 retrieved from the archive rooms at both hospitals and reviewed by research assistants  
34 who received dedicated in-service training.  
35  
36  
37  
38  
39  
40  
41  
42  
43  
44  
45  
46  
47  
48  
49  
50

### 51 **Study setting**

52  
53  
54 Hospital 1 is a general specialized 33-bed private hospital in Harar providing  
55 specialized care in internal medicine, surgery, obstetrics and gynecology, pediatrics  
56 and child health, and some other smaller fields. During the study period, five  
57 consultants and six midwives were practicing at the department of obstetrics. It  
58  
59  
60

provides care for both emergency and planned CS by consultants, with approximately 1000 births annually. Hospital 2 is one of the major private hospitals in Dire Dawa with almost 600 deliveries annually. Both hospitals have one major operation theatre which they share with all surgical specialties. Unlike public facilities, where all maternity services are free of charge [31], a typical CS procedure costs 10,000-15,000 Ethiopian Birr (\$267-400).

## Variables

The dependent variable was the Robson classification groups, one to ten based on the category of the pregnancy, presence of previous uterine scar, the course of labour and delivery, and the gestational age of the pregnancy (Box 1) [12]. The independent variables included sociodemographic conditions (age, referral status, residence), medical and obstetric history and conditions present in the index pregnancy.

Box 1: Robson's ten group caesarean section classification system [12]

| Group | Description                                                                                        |
|-------|----------------------------------------------------------------------------------------------------|
| 1     | Nulliparous, single cephalic, $\geq 37$ weeks, in spontaneous labour                               |
| 2     | Nulliparous, single cephalic, $\geq 37$ weeks, induced or CS before labour                         |
| 3     | Multiparous (excluding previous CS), single cephalic, $\geq 37$ weeks, in spontaneous labour       |
| 4     | Multiparous (excluding previous CS), single cephalic, $\geq 37$ weeks, induced or CS before labour |
| 5     | Previous CS, single cephalic, $\geq 37$ weeks                                                      |
| 6     | All nulliparous breeches                                                                           |
| 7     | All multiparous breeches (including previous CS)                                                   |
| 8     | All multiple pregnancies (including previous CS)                                                   |
| 9     | All abnormal lies (including previous CS)                                                          |
| 10    | All single cephalic, $< 37$ weeks (including previous CS)                                          |

## Data collection

This study was conducted as part of a larger study on maternal near miss [29]. The near miss study was conducted to assess magnitude of near miss among all women admitted to department of obstetrics and gynaecology. All women who fulfilled any of the sub-Saharan African maternal near miss criteria were included in the main study [30]. Trained research assistants collected data on maternal characteristics (age, parity, antenatal booking, referral status), obstetric and medical history and conditions (history of uterine scar, history or presence of obstetric complications), labor and delivery related information (onset, presentation, mode of birth, indication for CS for

births by CS), fetal/neonatal information (vital status at birth, fifth minute APGAR score, admission to special intensive care unit, birth weight), presence of maternal near miss events, and maternal and fetal outcome at discharge.

### Data processing and analysis

All collected data were cross-checked for completeness and consistency and double entered to EpiData 3.1 (<http://www.epidata.dk>) and exported to Stata 13 (<https://www.stata.com>) for analysis. The Robson group was determined using the four basic obstetric concepts and their parameters—pregnancy category, history of CS, course of labor and gestational age [12]. In addition, indications reported for CS were classified as absolute and non-absolute indications as per the recommendation by Stanton and Ronsmans [32]. Absolute indications include obstructed labor, major antepartum hemorrhage (including placenta previa grades 3 and 4), malpresentation (transverse, oblique, and brow presentation), and uterine rupture in hierarchical order. Non-absolute indications included previous history of CS, fetal compromise, failure to progress (prolonged labor, failed induction), breech, severe pre-eclampsia and eclampsia without hierarchical order.

### Patient and public involvement

Patients and/or the public were not involved in the design, or conduct, or reporting, or dissemination plans of this research.

## RESULTS

During the study period, 1287 maternity admissions were reported. After excluding 73 (5.7%) lost or incomplete files, 1214 records with complete data were reviewed constituting 1203 births (excluding abortions and laparotomies not resulting in births). A total of 415 births were by CS, making the overall CS rate 34.5% (277/839; 33% in hospital A and 138/364; 37.9% in hospital B). The mean age of participants was 26.7(±5.3) years ranging from 17 to 40. The mean gestational age was 38.9(±1.6) weeks. The majority of women were married (98.8%), urban residents (70.6%), and self-referred (94.9%). Details of sociodemographic conditions are summarized in Table 1.

Table 1: Sociodemographic conditions of women who underwent CS in selected private hospitals in eastern Ethiopia, 2020

| Variable                            | Frequency | %    |
|-------------------------------------|-----------|------|
| <b>Age</b>                          |           |      |
| <20                                 | 37        | 8.9  |
| 20-35                               | 356       | 85.8 |
| >35                                 | 22        | 5.3  |
| <b>Residence</b>                    |           |      |
| Urban                               | 293       | 70.6 |
| Rural                               | 122       | 29.4 |
| <b>Type of CS</b>                   |           |      |
| Elective                            | 85        | 20.5 |
| Emergency                           | 350       | 79.5 |
| <b>Referral status</b>              |           |      |
| Self-referral                       | 394       | 94.9 |
| Referred from other facilities      | 21        | 5.1  |
| <b>Antenatal care (at least 1)</b>  |           |      |
| Yes                                 | 387       | 93.3 |
| No                                  | 28        | 6.7  |
| <b>Parity</b>                       |           |      |
| 0                                   | 95        | 22.9 |
| 1-4                                 | 285       | 68.7 |
| >4                                  | 35        | 8.4  |
| <b>Gestational age (weeks) [33]</b> |           |      |
| Preterm (<37)                       | 9         | 2.2  |
| Term (37-41 6/7)                    | 400       | 96.4 |
| Post term ( $\geq$ 42)              | 6         | 1.4  |
| <b>Onset of labor</b>               |           |      |
| Spontaneous                         | 285       | 68.7 |
| Induced                             | 24        | 5.8  |
| CS before labor                     | 106       | 25.5 |
| <b>Fetal presentation</b>           |           |      |
| Cephalic                            | 393       | 94.7 |
| Breech                              | 18        | 4.3  |
| Transverse                          | 4         | 1    |
| <b>Birth weight (gram)</b>          |           |      |
| <2500                               | 12        | 2.9  |
| 2500-4000                           | 393       | 94.7 |
| >4000                               | 10        | 2.4  |

CS, cesarean section

### Analysis of the Robson classification

The three leading Robson groups were Robson group 5 (n=137;33%), 3 (n=114; 27.5%) and 1 (n=71;17.1%). The overall contribution of the 'high risk groups' (group 6, 7,8, and 9) to the overall CS rate was almost nil (6.2%). Details of the Robson groups and their respective contributions are summarized in Figure 1 and Table 2.

Figure 1: Distribution of women undergoing CS according to the Robson groups in selected private hospitals in eastern Ethiopia, 2020.



Table 2: Distribution of Robson groups and their contribution to the overall CS rate in selected private hospitals in eastern Ethiopia, 2020.

| Group | Description                                                                                    | CS/all births in the group | Contribution per group to total births (%) | CS rate within group (%) | Contribution per group to the CS rate (%) |
|-------|------------------------------------------------------------------------------------------------|----------------------------|--------------------------------------------|--------------------------|-------------------------------------------|
| 1     | Nulliparous, single cephalic, $\geq 37$ weeks, in spontaneous labor                            | 71/197                     | 16.4                                       | 36.0                     | 17.1                                      |
| 2     | Nulliparous, single cephalic, $\geq 37$ weeks, induced or CS before labor                      | 19/27                      | 2.2                                        | 70.4                     | 4.6                                       |
| 3     | Multiparous (excluding prev. CS), single cephalic, $\geq 37$ weeks, in spontaneous labor       | 114/690                    | 57.4                                       | 16.5                     | 27.5                                      |
| 4     | Multiparous (excluding prev. CS), single cephalic, $\geq 37$ weeks, induced or CS before labor | 39/72                      | 6.0                                        | 54.2                     | 9.4                                       |
| 5     | Previous CS, single cephalic, $\geq 37$ weeks                                                  | 137/153                    | 12.7                                       | 89.5                     | 33.0                                      |
| 6     | All nulliparous breeches                                                                       | 1/1                        | 0.1                                        | 100                      | 0.24                                      |
| 7     | All multiparous breeches                                                                       | 13/22                      | 1.8                                        | 59.1                     | 3.1                                       |
| 8     | All multiple pregnancies (including prev. CS)                                                  | 9/15                       | 1.2                                        | 60                       | 2.2                                       |
| 9     | All abnormal lies (including prev. CS)                                                         | 3/3                        | 0.3                                        | 100                      | 0.7                                       |
| 10    | All single cephalic, $\leq 36$ weeks (including prev. CS)                                      | 9/23                       | 1.9                                        | 39.1                     | 2.2                                       |
|       | <b>Total</b>                                                                                   | <b>415/1203</b>            | <b>100</b>                                 | <b>34.5</b>              | <b>100</b>                                |

### Overall and within group indication for CS

As indicated in Figure 2, the leading indications for performing CS in this study were fetal compromise (29.4%), previous CS (27.2%), and obstructed labor (12.3%). In general, CS was performed for absolute indications in 24.1% only (Figure 2).

Figure 2: Indications for performing CS in selected private hospitals in eastern Ethiopia, 2020.

Major indications within each Robson group are summarized in Table 3. Except for Robson groups 9 and 10 where malpresentation (n=3/3) and major APH (n=5/9) were leading indications, non-absolute indications were the main indications in all other groups: fetal compromise in Groups 1 (n=40/71; 56.3%) and 3 (n=68/114; 59.6%); previous CS in Group 5 (n=106/137; 77.4%); breech presentation in Group 6 (n=1/1; 100%), Group 7 (n=10/13; 76.9%), Group 8 (n=4/9; 44.4%).

Table 3: Overall and within Robson group indications for performing CS in selected private hospitals in eastern Ethiopia, 2020.

| indications | Group 1 | Group 2 | Group 3 | Group 4 | Group 5 | Group 6 | Group 7 | Group 8 | Group 9 | Group 10 | Total |
|-------------|---------|---------|---------|---------|---------|---------|---------|---------|---------|----------|-------|
|             |         |         |         |         |         |         |         |         |         |          |       |

| <b>Absolute indications</b>     |           |           |            |           |            |          |           |          |          |          |            |
|---------------------------------|-----------|-----------|------------|-----------|------------|----------|-----------|----------|----------|----------|------------|
| Obstructed labor                | 19        | 2         | 24         | 2         | 4          | 0        | 0         | 0        | 0        | 0        | 51         |
| Major APH                       | 2         | 1         | 14         | 6         | 9          | 0        | 0         | 0        | 0        | 5        | 37         |
| Malpresentation                 | 0         | 0         | 0          | 0         | 0          | 0        | 0         | 2        | 3        | 0        | 5          |
| Uterine rupture                 | 0         | 0         | 0          | 0         | 7          | 0        | 0         | 0        | 0        | 0        | 7          |
| <b>Non-absolute indications</b> |           |           |            |           |            |          |           |          |          |          |            |
| Previous CS                     | 0         | 0         | 2          | 2         | 106        | 0        | 2         | 1        | 0        | 0        | 113        |
| Fetal compromise                | 40        | 0         | 68         | 4         | 5          | 0        | 1         | 1        | 0        | 3        | 122        |
| Failure to progress             | 4         | 6         | 1          | 13        | 1          | 0        | 0         | 0        | 0        | 0        | 25         |
| Breech                          | 0         | 0         | 0          | 0         | 0          | 1        | 10        | 4        | 0        | 0        | 15         |
| (Severe pre-) eclampsia         | 5         | 2         | 4          | 1         | 3          | 0        | 0         | 0        | 0        | 1        | 16         |
| Others                          | 1         | 8         | 1          | 11        | 2          | 0        | 0         | 1        | 0        | 0        | 24*        |
| <b>Total</b>                    | <b>71</b> | <b>19</b> | <b>114</b> | <b>39</b> | <b>137</b> | <b>1</b> | <b>13</b> | <b>9</b> | <b>3</b> | <b>9</b> | <b>415</b> |

APH, antepartum hemorrhage; CS, caesarean section; \*18 on maternal requests and 6 unspecified

## DISCUSSION

This study was conducted to describe CS in selected private hospitals using the Robson classification. We found that women with a history of CS in a previous pregnancy (Group 5), single cephalic multiparous women at term in spontaneous labour with no previous history of CS (Group 3), and single cephalic nulliparous women at term and in spontaneous labour (Group 1) were the leading Robson groups contributing to eight in ten CS. In addition, the relatively moderate risk groups (Groups 1 to 4 combined), contributed to 58.6% of all CS in the participating private hospitals. The leading recorded indications for performing CS were fetal compromise, previous CS, and obstructed labor. Although the application of Robson classification for auditing CS is common practice, to the best of our knowledge, this is only the second reported study to apply this classification to private hospitals in a low-and middle-income country after the study by Begum et al in Bangladesh [18].

Our finding is consistent with a study previously conducted in a public university hospital in the same setting, although in a different order, where group 3, 5 and 1 were the leading contributors [28]. But the contribution of group 5 in our study is much higher compared to the previous study (33% vs 21.4%). The fact that women with no previous

1  
2  
3 CS (group 1, 2, 3 and 4) contributed to six in ten (58.6%) and mainly for non-absolute  
4 indications—fetal compromise and failure to progress—indicates the need to assess  
5 appropriateness of labor management in private settings. Minimizing primary CS in  
6 these low risk groups is essential since women with CS scar would often undergo CS.  
7  
8  
9

10  
11 Looking into the quality of data as per the WHO recommendation [13], shows good  
12 quality of data. The size of group 9 is in the expected range of <1% (0.3) with overall  
13 CS rate of 100%. In addition, looking into relative size of combination of 'group 1 and  
14 2' (18.6%), and 'group 3 and 4' (63.3%) in Table 2 (column 3) shows the presence of  
15 high multiparous women in the database, as evidence by high total fertility rate (4.6)  
16 in the country [34]. It may also reflect high vaginal delivery among women without prior  
17 scars. Furthermore, the ratio of 'group 3 to 4' is higher than the ratio of 'group 1 to 2'  
18 indicating good quality of data [13]. However, the ratio of 'group 6 to 7' was very low  
19 (0.05) compared to the expected high breeches among nulliparas compared to  
20 multipara. Given the quality of our data is acceptable as indicated by other parameters  
21 above, this requires further audit.  
22  
23  
24  
25  
26  
27  
28  
29

30  
31 Given that groups 5, 3 and 1 constitute large demographic shares, it was expected  
32 that these would contribute largely to the overall CS. However, the fact that CS rates  
33 within these groups were 89.5%,16.5%, and 36.0%, respectively indicates vast  
34 opportunities to reduce CS rates by strengthening clinical practice around vaginal  
35 birth, including vaginal birth after CS. The numbers do raise concerns about quality of  
36 care around vaginal birth in private care facilities in Ethiopia. Although group 5  
37 comprised 12.5% of all births, it contributed 33% to the overall CS rate—possibly  
38 indicating low utilization of trial of labor or instrumental vaginal birth. Trial of labor in  
39 sub-Saharan Africa in general is low [35] although this practice may be justified in a  
40 majority of women with a previous scar if combined with proper labor monitoring [36].  
41  
42  
43  
44  
45  
46  
47  
48  
49

### 50 **Strengths and limitations**

51  
52 This study is the first study to apply the Robson classification to major private hospitals  
53 in Ethiopia. Inclusion of all women who gave birth in both facilities (CS and vaginal  
54 deliveries) during the study period helped us to indicate the Robson distribution as a  
55 whole and also among those who had CS without selection bias. However, the study  
56 has some limitations to be considered. *First*, as the data were retrospectively collected  
57  
58  
59  
60

1  
2  
3 from medical records, some important socio-economic variables—which are not  
4 routinely documented—were missed. *Second*, data on trial of labor or partograph use  
5 is not often documented making it difficult to comment on management of labor and  
6 timeliness of the decisions to undergo CS.  
7  
8  
9

## 10 **CONCLUSION**

11  
12  
13  
14 More than three-fourth of CS was performed among Robson groups 5, 3, and 1—  
15 indicating inadequate trial of labour after CS or management of labor among relatively  
16 low risk groups (3 and 1). Although the overall CS rate in this study is not as high as  
17 those reported in private hospitals in some other clinics, it requires further study since  
18 a majority (68%) of women who undergone CS did not have any underlying obstetric  
19 complications [37]. In addition, the high CS rate among women with a scarred uterus  
20 (89.2%) requires further audit of obstetric interventions provided to these women.  
21 Since these private hospitals are well equipped with fetal monitoring and the ability to  
22 perform CS quickly, trial of labor after CS should be attempted and the missed  
23 opportunities should be further explored.  
24  
25  
26  
27  
28  
29  
30  
31

## 32 **Declarations**

33  
34  
35 **Acknowledgements** We want to thank the hospital managers for allowing us to  
36 conduct this study in their respective hospitals.  
37

38  
39 **Contributors** AKT conceived the study and wrote the original draft of the manuscript  
40 which was subsequently reviewed by SG, SGF, and TvdA. SG was involved in  
41 proposal development and collected data under the supervision and mentorship of  
42 AKT. Analysis was done by AKT. SG, SGF, and TvdA reviewed the manuscript for  
43 intellectual content and participated in revision. All authors contributed to the writing  
44 and reviewed the article and approved the final version of the manuscript to be  
45 published.  
46  
47  
48  
49

50  
51 **Funding** SG received a grant from Haramaya University for his MSc study (grant  
52 number: not applicable).  
53

54 **Disclaimer** The funding organisation has no role in the design, execution or decision  
55 to publish the study.  
56

57 **Competing interests** None declared.  
58

59 **Patient consent** Not required.  
60

1  
2  
3 **Ethics approval** This study was approved by the institutional health research  
4 ethics review committee of College of Health and Medical Sciences, Haramaya  
5 University, Ethiopia (IHRERC/045/2020).  
6  
7

8  
9 **Data sharing statement** Data essential for conclusion are included in the manuscript.  
10 Additional data can be obtained from the corresponding author on reasonable request.  
11  
12  
13

## 14 15 16 **REFERENCES**

- 17  
18  
19 1 World Health Organization. World health statistics 2015: World Health  
20 Organization 2015.  
21  
22 2 Betrán AP, Ye J, Moller AB, et al. The Increasing Trend in Caesarean Section  
23 Rates: Global, Regional and National Estimates: 1990-2014, *PLoS One* 2016;11:  
24 e0148343.  
25  
26 3 Rijken MJ, Meguid T, van den Akker T, et al. Global surgery and the dilemma for  
27 obstetricians, *Lancet* 2015;386:1941-2.  
28  
29 4 Fesseha N, Getachew A, Hiluf M, et al. A national review of cesarean delivery in  
30 Ethiopia, *Int J Gynaecol Obstet* 2011;115:106-11.  
31  
32 5 Boatin AA, Schlotheuber A, Betran AP, et al. Within country inequalities in  
33 caesarean section rates: observational study of 72 low and middle income countries,  
34 *BMJ* 2018;360.  
35  
36 6 Betrán AP, Merialdi M, Lauer JA, et al. Rates of caesarean section: analysis of  
37 global, regional and national estimates, *Paediatr Perinat Epidemiol* 2007;21:98-113.  
38  
39 7 Keag OE, Norman JE, Stock SJ. Long-term risks and benefits associated with  
40 cesarean delivery for mother, baby, and subsequent pregnancies: Systematic review  
41 and meta-analysis, *PLoS Med* 2018;15: e1002494.  
42  
43 8 Masukume G, McCarthy FP, Russell J, et al. Caesarean section delivery and  
44 childhood obesity: evidence from the growing up in New Zealand cohort, *J Epidemiol*  
45 *Community Health* 2019;73:1063-70.  
46  
47 9 Sandall J, Tribe RM, Avery L, et al. Short-term and long-term effects of caesarean  
48 section on the health of women and children, *Lancet* 2018;392:1349-57.  
49  
50 10 Betrán AP, Vindevoghel N, Souza JP, et al. A systematic review of the Robson  
51 classification for caesarean section: what works, doesn't work and how to improve it,  
52 *PLoS One* 2014;9: e97769.  
53  
54  
55  
56  
57  
58  
59  
60

- 1  
2  
3 11 Le Ray C, Blondel B, Prunet C, et al. Stabilising the caesarean rate: which target  
4 population? *BJOG* 2015; 122:690-9.  
5  
6  
7 12 Robson MS. Can we reduce the caesarean section rate? *Best Pract Res Clin*  
8 *Obstet Gynaecol* 2001; 15:179-94.  
9  
10 13 World Health Organization. Robson classification: implementation manual, 2017.  
11  
12 14 Robson M. The Ten Group Classification System (TGCS) - a common starting  
13 point for more detailed analysis, *BJOG* 2015;122:701,0528.13267.  
14  
15  
16 15 Alonso BD, Silva, F. M. B. D., Latorre, M. D. R. D. O., et al. Caesarean birth rates  
17 in public and privately funded hospitals: a cross-sectional study, *Rev Saude Publica*  
18 2017;51:101,8787.2017051007054.  
19  
20 21 Hoxha I, Syrogiannouli L, Luta X, et al. Caesarean sections and for-profit status of  
22 hospitals: systematic review and meta-analysis, *BMJ Open* 2017;7: e013670.  
23  
24 25 17 Atnurkar KB, Mahale AR. Audit of Caesarean Section Births in Small Private  
26 Maternity Homes: Analysis of 15-Year Data Applying the Modified Robson Criteria,  
27 Canada, *J Obstet Gynaecol India* 2016;66:289-94.  
28  
29 30 18 Begum T, Nababan H, Rahman A, et al. Monitoring caesarean births using the  
31 Robson ten group classification system: A cross-sectional survey of private for-profit  
32 facilities in urban Bangladesh, *PLoS One* 2019;14:e0220693.  
33  
34 35 19 Cavallaro FL, Cresswell JA, França GV, et al. Trends in caesarean delivery by  
36 country and wealth quintile: cross-sectional surveys in southern Asia and sub-  
37 Saharan Africa, *Bull World Health Organ* 2013;91:914-922D.  
38  
39 40 20 Hanson C, Betrán AP, Opondo C, et al. Trends in caesarean section rates  
41 between 2007 and 2013 in obstetric risk groups inspired by the Robson  
42 classification: results from population-based surveys in a low-resource setting, *BJOG*  
43 2019;126:690-700.  
44  
45 46 21 Harrison MS, Saleem S, Ali S, et al. A Prospective, Population-Based Study of  
47 Trends in Operative Vaginal Delivery Compared to Cesarean Delivery Rates in Low-  
48 and Middle-Income Countries, 2010-2016, *Am J Perinatol* 2019;36:730-6.  
49  
50 51 22 Chanrachakul B, Herabutya Y, Udomsubpayakul U. Epidemic of cesarean section  
52 at the general, private and university hospitals in Thailand, *J Obstet Gynaecol Res*  
53 2000;26:357-61.  
54  
55 56 23 Phadungkiatwattana P, Tongsakul N. Analyzing the impact of private service on  
57 the cesarean section rate in public hospital Thailand, *Arch Gynecol Obstet*  
58 2011;284:1375-9.  
59  
60 24 Einarsdóttir K, Haggar F, Pereira G, et al. Role of public and private funding in the  
rising caesarean section rate: a cohort study, *BMJ Open* 2013;3: e002789.

1  
2  
3 25 Dahlen HG, Tracy S, Tracy M, et al. Rates of obstetric intervention among low-risk women giving birth in private and public hospitals in NSW: a population-based descriptive study, *BMJ Open* 2012;2: e001723.

4  
5  
6  
7  
8 26 Ali Y, Khan MW, Mumtaz U, et al. Identification of factors influencing the rise of cesarean sections rates in Pakistan, using MCDM, *Int J Health Care Qual Assur* 2018;31:1058-69.

9  
10  
11  
12 27 Gebremedhin S. Trend and socio-demographic differentials of Caesarean section rate in Addis Ababa, Ethiopia: analysis based on Ethiopia demographic and health surveys data, *Reprod Health* 2014;11:14.

13  
14  
15  
16  
17 28 Tura AK, Pijpers O, de Man M, et al. Analysis of caesarean sections using Robson 10-group classification system in a university hospital in eastern Ethiopia: a cross-sectional study, *BMJ Open* 2018;8:e020520.

18  
19  
20  
21  
22 29 Tenaw SG, Assefa N, Mulatu T, et al. Maternal near miss among women admitted in major private hospitals in eastern Ethiopia: a retrospective study, *BMC Pregnancy and Childbirth* 2021;21:1-9.

23  
24  
25  
26  
27 30 Tura AK, Stekelenburg J, Scherjon SA, et al. Adaptation of the WHO maternal near miss tool for use in sub-Saharan Africa: An International Delphi study, *BMC Pregnancy Childbirth* 2017;17:445.

28  
29  
30  
31 31 Pearson L, Gandhi M, Admasu K, et al. User fees and maternity services in Ethiopia, *Int J Gynaecol Obstet* 2011;115:310-5.

32  
33  
34  
35 32 Stanton C, Ronsmans C, Baltimore Group on Cesarean. Recommendations for routine reporting on indications for cesarean delivery in developing countries, *Birth* 2008;35:204-11.

36  
37  
38  
39 33 World Health Organization. ICD-10:International Statistical Classification of Diseases and Related Health Problems 2010:151-2.

40  
41  
42  
43 34 CSACE I. Ethiopia Demographic and Health Survey 2016, *Addis Ababa, Ethiopia, and Rockville, Maryland, USA: CSA and ICF* 2016.

44  
45  
46  
47 35 Boulvain M, Fraser WD, Brisson-Carroll G, et al. Trial of labour after caesarean section in sub-Saharan Africa: a meta-analysis, *Br J Obstet Gynaecol* 1997;104:1385-90.

48  
49  
50  
51 36 van Roosmalen J. Vaginal birth after cesarean section in rural Tanzania, *Int J Gynaecol Obstet* 1991;34:211-5.

52  
53  
54  
55 37 Bishop D, Dyer RA, Maswime S, et al. Maternal and neonatal outcomes after caesarean delivery in the African Surgical Outcomes Study: a 7-day prospective observational cohort study, *The Lancet Global Health* 2019;7:e513-22

56  
57  
58  
59 1 World Health Organization. World health statistics 2015: World Health Organization 2015.

- 1  
2  
3 2 Betrán AP, Ye J, Moller AB, et al. The Increasing Trend in Caesarean Section  
4 Rates: Global, Regional and National Estimates: 1990-2014, *PLoS One*  
5 2016;11:e0148343 doi:10.1371/journal.pone.0148343 [doi] [published Online First:  
6 Feb 5].  
7
- 8  
9 3 Rijken MJ, Meguid T, van den Akker T, et al. Global surgery and the dilemma for  
10 obstetricians, *Lancet* 2015;386:1941-2.  
11
- 12 4 Fesseha N, Getachew A, Hiluf M, et al. A national review of cesarean delivery in  
13 Ethiopia, *Int J Gynaecol Obstet* 2011;115:106-11 doi:10.1016/j.ijgo.2011.07.011 [doi]  
14 [published Online First: October 01].  
15
- 16 5 Boatin AA, Schlottheuber A, Betran AP, et al. Within country inequalities in  
17 caesarean section rates: observational study of 72 low and middle income countries,  
18 *BMJ* 2018;360.  
19
- 20 6 Betrán AP, Merialdi M, Lauer JA, et al. Rates of caesarean section: analysis of  
21 global, regional and national estimates, *Paediatr Perinat Epidemiol* 2007;21:98-113  
22 doi:PPE786 [pii] [published Online First: Mar].  
23
- 24 7 Keag OE, Norman JE, Stock SJ. Long-term risks and benefits associated with  
25 cesarean delivery for mother, baby, and subsequent pregnancies: Systematic review  
26 and meta-analysis, *PLoS Med* 2018;15:e1002494  
27 doi:10.1371/journal.pmed.1002494 [doi] [published Online First: Jan 23].  
28
- 29 8 Masukume G, McCarthy FP, Russell J, et al. Caesarean section delivery and  
30 childhood obesity: evidence from the growing up in New Zealand cohort, *J Epidemiol*  
31 *Community Health* 2019;73:1063-70 doi:10.1136/jech-2019-212591 [doi] [published  
32 Online First: Dec].  
33
- 34 9 Sandall J, Tribe RM, Avery L, et al. Short-term and long-term effects of caesarean  
35 section on the health of women and children, *Lancet* 2018;392:1349-57 doi:S0140-  
36 6736(18)31930-5 [pii] [published Online First: Oct 13].  
37
- 38 10 Betrán AP, Vindevoghel N, Souza JP, et al. A systematic review of the Robson  
39 classification for caesarean section: what works, doesn't work and how to improve it,  
40 *PLoS One* 2014;9:e97769 doi:10.1371/journal.pone.0097769 [doi] [published Online  
41 First: Jun 3].  
42
- 43 11 Le Ray C, Blondel B, Prunet C, et al. Stabilising the caesarean rate: which target  
44 population? *BJOG* 2015;122:690-9 doi:10.1111/1471-0528.13199 [doi] [published  
45 Online First: Apr].  
46
- 47 12 Robson MS. Can we reduce the caesarean section rate? *Best Pract Res Clin*  
48 *Obstet Gynaecol* 2001;15:179-94 doi:S1521693400901561 [pii] [published Online  
49 First: Feb].  
50
- 51 13 World Health Organization. Robson classification: implementation manual, 2017.  
52  
53  
54  
55  
56  
57  
58  
59  
60



1  
2  
3 14 Robson M. The Ten Group Classification System (TGCS) - a common starting  
4 point for more detailed analysis, *BJOG* 2015;122:701,0528.13267. Epub 2015 Jan  
5 20 doi:10.1111/1471-0528.13267 [doi] [published Online First: Apr].  
6

7  
8 15 Alonso BD, Silva, F. M. B. D., Latorre, M. D. R. D. O., et al. Caesarean birth rates  
9 in public and privately funded hospitals: a cross-sectional study, *Rev Saude Publica*  
10 2017;51:101,8787.2017051007054. Epub 2017 Nov 17 doi:S0034-  
11 89102017000100294 [pii].  
12

13  
14 16 Hoxha I, Syrogiannouli L, Luta X, et al. Caesarean sections and for-profit status of  
15 hospitals: systematic review and meta-analysis, *BMJ Open* 2017;7:e013670-013670  
16 doi:10.1136/bmjopen-2016-013670 [doi] [published Online First: Feb 17].  
17

18  
19 17 Atnurkar KB, Mahale AR. Audit of Caesarean Section Births in Small Private  
20 Maternity Homes: Analysis of 15-Year Data Applying the Modified Robson Criteria,  
21 Canada, *J Obstet Gynaecol India* 2016;66:289-94 doi:10.1007/s13224-016-0894-y  
22 [doi] [published Online First: Oct].  
23

24  
25 18 Begum T, Nababan H, Rahman A, et al. Monitoring caesarean births using the  
26 Robson ten group classification system: A cross-sectional survey of private for-profit  
27 facilities in urban Bangladesh, *PLoS One* 2019;14:e0220693  
28 doi:10.1371/journal.pone.0220693 [doi] [published Online First: Aug 8].  
29

30  
31 19 Cavallaro FL, Cresswell JA, França GV, et al. Trends in caesarean delivery by  
32 country and wealth quintile: cross-sectional surveys in southern Asia and sub-  
33 Saharan Africa, *Bull World Health Organ* 2013;91:914-922D  
34 doi:10.2471/BLT.13.117598 [doi] [published Online First: Dec 1].  
35

36  
37 20 Hanson C, Betrán AP, Opondo C, et al. Trends in caesarean section rates  
38 between 2007 and 2013 in obstetric risk groups inspired by the Robson  
39 classification: results from population-based surveys in a low-resource setting, *BJOG*  
40 2019;126:690-700 doi:10.1111/1471-0528.15534 [doi] [published Online First: May].  
41

42  
43 21 Harrison MS, Saleem S, Ali S, et al. A Prospective, Population-Based Study of  
44 Trends in Operative Vaginal Delivery Compared to Cesarean Delivery Rates in Low-  
45 and Middle-Income Countries, 2010-2016, *Am J Perinatol* 2019;36:730-6  
46 doi:10.1055/s-0038-1673656 [doi] [published Online First: Jun].  
47

48  
49 22 Chanrachakul B, Herabutya Y, Udomsubpayakul U. Epidemic of cesarean section  
50 at the general, private and university hospitals in Thailand, *J Obstet Gynaecol Res*  
51 2000;26:357-61 doi:10.1111/j.1447-0756.2000.tb01339.x [doi] [published Online  
52 First: Oct].  
53

54  
55 23 Phadungkiatwattana P, Tongsakul N. Analyzing the impact of private service on  
56 the cesarean section rate in public hospital Thailand, *Arch Gynecol Obstet*  
57 2011;284:1375-9 doi:10.1007/s00404-011-1867-0 [doi] [published Online First: Dec].  
58

59  
60 24 Einarsdóttir K, Haggar F, Pereira G, et al. Role of public and private funding in the  
rising caesarean section rate: a cohort study, *BMJ Open* 2013;3:e002789. doi:

1  
2  
3 10.1136/bmjopen-002789 doi:10.1136/bmjopen-2013-002789 [doi] [published Online  
4 First: May 2].  
5

6  
7 25 Dahlen HG, Tracy S, Tracy M, et al. Rates of obstetric intervention among low-  
8 risk women giving birth in private and public hospitals in NSW: a population-based  
9 descriptive study, *BMJ Open* 2012;2:e001723. doi: 10.1136/bmjopen,001723. Print  
10 2012 doi:10.1136/bmjopen-2012-001723 [doi] [published Online First: Sep 10].  
11

12  
13 26 Ali Y, Khan MW, Mumtaz U, et al. Identification of factors influencing the rise of  
14 cesarean sections rates in Pakistan, using MCDM, *Int J Health Care Qual Assur*  
15 2018;31:1058-69 doi:10.1108/IJHCQA-04-2018-0087 [doi] [published Online First:  
16 Oct 8].  
17

18  
19 27 Gebremedhin S. Trend and socio-demographic differentials of Caesarean section  
20 rate in Addis Ababa, Ethiopia: analysis based on Ethiopia demographic and health  
21 surveys data, *Reprod Health* 2014;11:14- doi:1742-4755-11-14 [pii].  
22

23  
24 28 Tura AK, Pijpers O, de Man M, et al. Analysis of caesarean sections using  
25 Robson 10-group classification system in a university hospital in eastern Ethiopia: a  
26 cross-sectional study, *BMJ Open* 2018;8:e020520-020520 doi:10.1136/bmjopen-  
27 2017-020520 [doi] [published Online First: Apr 4].  
28

29  
30 29 Tenaw SG, Assefa N, Mulatu T, et al. Maternal near miss among women  
31 admitted in major private hospitals in eastern Ethiopia: a retrospective study, *BMC*  
32 *Pregnancy and Childbirth* 2021;21:1-9.  
33

34  
35 30 Tura AK, Stekelenburg J, Scherjon SA, et al. Adaptation of the WHO maternal  
36 near miss tool for use in sub-Saharan Africa: an International Delphi study, *BMC*  
37 *Pregnancy Childbirth* 2017;17:445-x doi:10.1186/s12884-017-1640-x [doi] [published  
38 Online First: Dec 29].  
39

40  
41 31 Pearson L, Gandhi M, Admasu K, et al. User fees and maternity services in  
42 Ethiopia, *Int J Gynaecol Obstet* 2011;115:310-5.  
43

44  
45 32 Stanton C, Ronsmans C, Baltimore Group on Cesarean. Recommendations for  
46 routine reporting on indications for cesarean delivery in developing countries, *Birth*  
47 2008;35:204-11 doi:10.1111/j.1523-536X.2008.00241.x [doi] [published Online First:  
48 Sep].  
49

50  
51 33 World Health Organization. ICD-10:International  
52 Statistical  
53 Classification  
54 of Diseases and  
55 Related Health  
56 Problems 2010:151-2.  
57

58  
59 34 CSACE I. Ethiopia Demographic and Health Survey 2016, *Addis Ababa, Ethiopia,*  
60 *and Rockville, Maryland, USA: CSA and ICF* 2016.

1  
2  
3 35 Boulvain M, Fraser WD, Brisson-Carroll G, et al. Trial of labour after caesarean  
4 section in sub-Saharan Africa: a meta-analysis, *Br J Obstet Gynaecol*  
5 1997;104:1385-90 doi:10.1111/j.1471-0528.1997.tb11008.x [doi] [published Online  
6 First: Dec].  
7

8  
9 36 van Roosmalen J. Vaginal birth after cesarean section in rural Tanzania, *Int J*  
10 *Gynaecol Obstet* 1991;34:211-5 doi:10.1016/0020-7292(91)90351-5 [doi] [published  
11 Online First: Mar].  
12

13 37 Bishop D, Dyer RA, Maswime S, et al. Maternal and neonatal outcomes after  
14 caesarean delivery in the African Surgical Outcomes Study: a 7-day prospective  
15 observational cohort study, *The Lancet Global Health* 2019;7:e513-22  
16 doi:10.1016/S2214-109X(19)30036-1.  
17  
18  
19  
20  
21  
22  
23  
24  
25  
26  
27  
28  
29  
30  
31  
32  
33  
34  
35  
36  
37  
38  
39  
40  
41  
42  
43  
44  
45  
46  
47  
48  
49  
50  
51  
52  
53  
54  
55  
56  
57  
58  
59  
60

1 Figure 1



27  
28 Figure 1: Distribution of women undergoing CS according to the Robson groups in selected private hospitals in  
29 eastern Ethiopia, 2020.  
30

1 Figure 2

2  
3  
4  
5  
6  
7  
8  
9  
10  
11  
12  
13  
14  
15  
16  
17  
18  
19  
20  
21  
22  
23  
24  
25  
26  
27  
28  
29  
30  
31  
32  
33  
34  
35  
36  
37  
38  
39  
40  
41  
42  
43  
44  
45  
46  
47  
48  
49  
50  
51  
52  
53  
54  
55  
56  
57  
58  
59  
60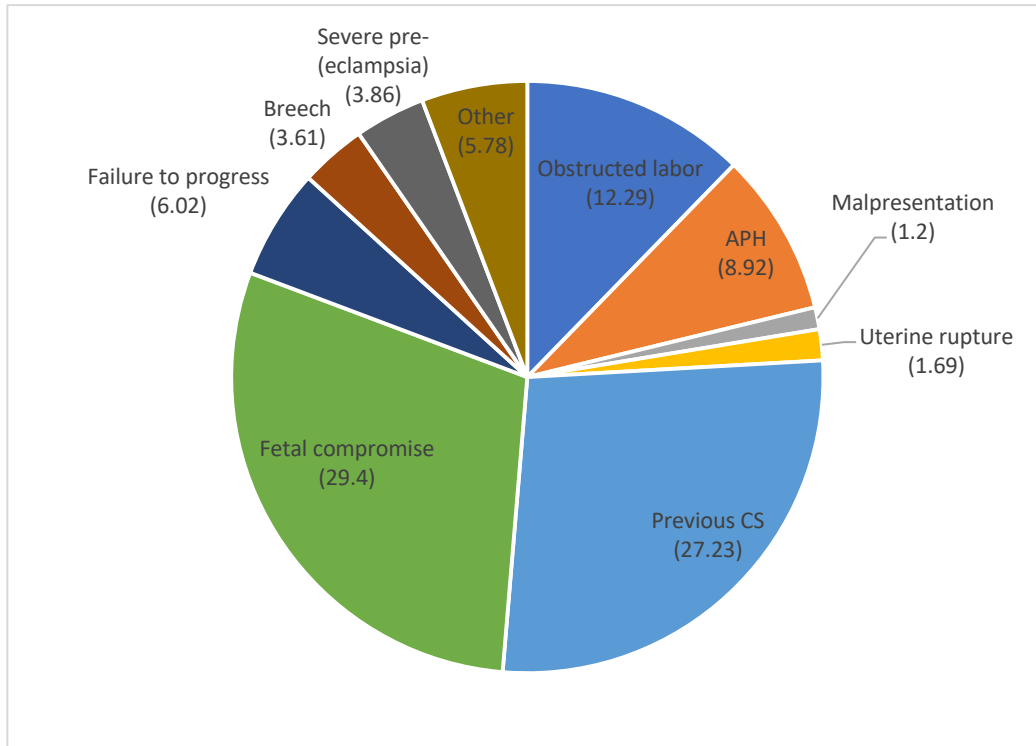

Figure 2: Indications for performing CS in selected private hospitals in eastern Ethiopia, 2020.

**STROBE 2007 (v4) Statement—Checklist of items that should be included in reports of *cross-sectional studies***

| Section/Topic                | Item # | Recommendation                                                                                                                                                                       | Reported on page # |
|------------------------------|--------|--------------------------------------------------------------------------------------------------------------------------------------------------------------------------------------|--------------------|
| <b>Title and abstract</b>    | 1      | (a) Indicate the study's design with a commonly used term in the title or the abstract                                                                                               | 1                  |
|                              |        | (b) Provide in the abstract an informative and balanced summary of what was done and what was found                                                                                  | 2                  |
| <b>Introduction</b>          |        |                                                                                                                                                                                      |                    |
| Background/rationale         | 2      | Explain the scientific background and rationale for the investigation being reported                                                                                                 | 3                  |
| Objectives                   | 3      | State specific objectives, including any prespecified hypotheses                                                                                                                     | 3                  |
| <b>Methods</b>               |        |                                                                                                                                                                                      |                    |
| Study design                 | 4      | Present key elements of study design early in the paper                                                                                                                              | 4-5                |
| Setting                      | 5      | Describe the setting, locations, and relevant dates, including periods of recruitment, exposure, follow-up, and data collection                                                      | 4                  |
| Participants                 | 6      | (a) Give the eligibility criteria, and the sources and methods of selection of participants                                                                                          | 5                  |
| Variables                    | 7      | Clearly define all outcomes, exposures, predictors, potential confounders, and effect modifiers. Give diagnostic criteria, if applicable                                             | 5                  |
| Data sources/<br>measurement | 8*     | For each variable of interest, give sources of data and details of methods of assessment (measurement). Describe comparability of assessment methods if there is more than one group | 5                  |
| Bias                         | 9      | Describe any efforts to address potential sources of bias                                                                                                                            | na                 |
| Study size                   | 10     | Explain how the study size was arrived at                                                                                                                                            | 5                  |
| Quantitative variables       | 11     | Explain how quantitative variables were handled in the analyses. If applicable, describe which groupings were chosen and why                                                         | 5                  |
| Statistical methods          | 12     | (a) Describe all statistical methods, including those used to control for confounding                                                                                                | 5                  |
|                              |        | (b) Describe any methods used to examine subgroups and interactions                                                                                                                  | na                 |
|                              |        | (c) Explain how missing data were addressed                                                                                                                                          | na                 |
|                              |        | (d) If applicable, describe analytical methods taking account of sampling strategy                                                                                                   | na                 |
|                              |        | (e) Describe any sensitivity analyses                                                                                                                                                | na                 |
| <b>Results</b>               |        |                                                                                                                                                                                      |                    |

|                          |     |                                                                                                                                                                                                              |     |
|--------------------------|-----|--------------------------------------------------------------------------------------------------------------------------------------------------------------------------------------------------------------|-----|
| Participants             | 13* | (a) Report numbers of individuals at each stage of study—eg numbers potentially eligible, examined for eligibility, confirmed eligible, included in the study, completing follow-up, and analysed            | 6   |
|                          |     | (b) Give reasons for non-participation at each stage                                                                                                                                                         | 6   |
|                          |     | (c) Consider use of a flow diagram                                                                                                                                                                           | 6   |
| Descriptive data         | 14* | (a) Give characteristics of study participants (eg demographic, clinical, social) and information on exposures and potential confounders                                                                     | 6   |
|                          |     | (b) Indicate number of participants with missing data for each variable of interest                                                                                                                          | na  |
| Outcome data             | 15* | Report numbers of outcome events or summary measures                                                                                                                                                         | 7-9 |
| Main results             | 16  | (a) Give unadjusted estimates and, if applicable, confounder-adjusted estimates and their precision (eg, 95% confidence interval). Make clear which confounders were adjusted for and why they were included | 7-9 |
|                          |     | (b) Report category boundaries when continuous variables were categorized                                                                                                                                    | na  |
|                          |     | (c) If relevant, consider translating estimates of relative risk into absolute risk for a meaningful time period                                                                                             | na  |
| Other analyses           | 17  | Report other analyses done—eg analyses of subgroups and interactions, and sensitivity analyses                                                                                                               | na  |
| <b>Discussion</b>        |     |                                                                                                                                                                                                              |     |
| Key results              | 18  | Summarise key results with reference to study objectives                                                                                                                                                     | 9   |
| Limitations              | 19  | Discuss limitations of the study, taking into account sources of potential bias or imprecision. Discuss both direction and magnitude of any potential bias                                                   | 10  |
| Interpretation           | 20  | Give a cautious overall interpretation of results considering objectives, limitations, multiplicity of analyses, results from similar studies, and other relevant evidence                                   | 10  |
| Generalisability         | 21  | Discuss the generalisability (external validity) of the study results                                                                                                                                        | 10  |
| <b>Other information</b> |     |                                                                                                                                                                                                              |     |
| Funding                  | 22  | Give the source of funding and the role of the funders for the present study and, if applicable, for the original study on which the present article is based                                                | 10  |

\*Give information separately for cases and controls in case-control studies and, if applicable, for exposed and unexposed groups in cohort and cross-sectional studies.

**Note:** An Explanation and Elaboration article discusses each checklist item and gives methodological background and published examples of transparent reporting. The STROBE checklist is best used in conjunction with this article (freely available on the Web sites of PLoS Medicine at <http://www.plosmedicine.org/>, Annals of Internal Medicine at <http://www.annals.org/>, and Epidemiology at <http://www.epidem.com/>). Information on the STROBE Initiative is available at [www.strobe-statement.org](http://www.strobe-statement.org).
